# Supplementary material for: A regulatory microRNA network controls endothelial cell phenotypic switch during sprouting angiogenesis
Source: eLife. 2020 Jan 24;9:e48095. doi: 10.7554/eLife.48095 (PMC7299339; doi:10.7554/eLife.48095)
Supplement: Figure 3—source data 1. [file elife-48095-fig3-data1.xlsx]

## Sheet: Sheet1
Figure 3-source data 1. MicroRNA annotation of RNA-Seq data.
	Raw Counts						Normalized Counts (RPKM)
	Unstimulated (SPHC)			Stimulated (SPHV)			Unstimulated (SPHC)			Stimulated (SPHV)
miRBase_v22_ID	rep_1	rep_2	rep_3	rep_1	rep_2	rep_3	rep_1	rep_2	rep_3	rep_1	rep_2	rep_3
hsa-let-7a-2-3p	46	30	48	31	19	30	215.738	163.279	198.819	112.473	77.5041	129.746
hsa-let-7a-3p	59	107	83	162	210	151	289.884	610.092	360.162	615.75	897.416	684.151
hsa-let-7a-5p	61605	48281	64430	66140	60938	60514	288924	262775	266873	239966	248576	261714
hsa-let-7b-3p	143	194	255	160	166	155	670.663	1055.87	1056.23	580.505	677.141	670.353
hsa-let-7b-5p	6350	7449	10322	9099	8082	9397	29781.2	40542.1	42754.4	33012.6	32967.8	40640.7
hsa-let-7c-3p	116	86	124	79	62	48	544.034	468.065	513.616	286.624	252.908	207.593
hsa-let-7c-5p	10404	12565	13498	18569	16529	16975	48794.3	68386.5	55909.6	67371.2	67424.5	73414.4
hsa-let-7d-3p	921	937	1052	837	613	593	4319.45	5099.73	4357.45	3036.77	2500.53	2564.64
hsa-let-7d-5p	6194	5026	8091	5962	5876	6580	29049.6	27354.6	33513.4	21631.1	23969.2	28457.5
hsa-let-7e-3p	154	139	163	104	66	87	722.253	756.524	675.156	377.328	269.225	376.262
hsa-let-7e-5p	7505	8346	10477	14306	13045	15512	35198.1	45424.1	43396.4	51904.4	53212.7	67087.2
hsa-let-7f-1-3p	123	144	135	104	69	113	576.864	783.737	559.178	377.328	281.462	488.709
hsa-let-7f-2-3p	208	226	215	220	228	228	975.51	1230.03	890.543	798.194	930.049	986.067
hsa-let-7f-5p	96798	82920	109872	116668	122214	130157	453978	451302	455097	423290	498531	562910
hsa-let-7g-3p	18	10	8	13	15	13	88.4391	57.0179	34.7144	49.412	64.1011	58.9004
hsa-let-7g-5p	17132	17783	18523	26012	24659	23683	80348.3	96786.1	76723.4	94375.6	100588	102426
hsa-let-7i-3p	276	209	219	314	316	281	1294.43	1137.51	907.112	1139.24	1289.02	1215.28
hsa-let-7i-5p	245594	226857	230680	294190	288788	252546	1.15182e+06	1.2347e+06	955491	1.06737e+06	1.17801e+06	1.09222e+06
hsa-miR-100-3p	3910	1788	2872	1618	1195	1162	18337.7	9731.4	11896	5870.35	4874.6	5025.48
hsa-miR-100-5p	260484	199878	239618	217494	184915	137718	1.22166e+06	1.08786e+06	992513	789102	754298	595610
hsa-miR-101-3p	1318	1143	1198	2141	2431	2017	6475.71	6517.15	5198.49	8137.78	10388.7	9138.63
hsa-miR-101-5p	9	14	22	31	22	41	42.2096	76.1967	91.1254	112.473	89.7416	177.319
hsa-miR-10399-3p	22	21	24	12	16	21	108.092	119.738	104.143	45.6111	68.3745	95.1468
hsa-miR-10399-5p	22	25	32	28	35	24	108.092	142.545	138.858	106.426	149.569	108.739
hsa-miR-103a-2-5p	4	9	11	7	5	12	17.9442	46.8539	43.5817	24.2929	19.509	49.6418
hsa-miR-103a-3p	12096	11778	12553	15041	17900	14393	54263.2	61316.1	49734.6	52198.4	69842.3	59541.2
hsa-miR-103b	12148	11776	12643	15019	18000	14477	54496.4	61305.7	50091.2	52122.1	70232.5	59888.7
hsa-miR-10400-5p	37	29	29	134	147	126	181.791	165.352	125.84	509.324	628.191	570.881
hsa-miR-10523-5p	10	8	15	4	6	5	42.9912	39.9125	56.9534	13.3032	22.4354	19.8223
hsa-miR-10526-3p	7	6	9	9	8	10	36.1126	35.9213	41.0064	35.9187	35.8966	47.5734
hsa-miR-106a-5p	17	12	14	7	6	5	76.2627	62.4718	55.4676	24.2929	23.4108	20.6841
hsa-miR-106b-3p	1732	1460	1818	2043	1834	1817	8123	7946.22	7530.27	7412.32	7481.18	7858.26
hsa-miR-106b-5p	1271	1227	1366	1646	1674	1490	6244.78	6996.1	5927.49	6256.32	7153.68	6750.89
hsa-miR-107	2157	1979	2201	2751	3067	2430	9676.39	10302.6	8720.3	9547.1	11966.8	10052.5
hsa-miR-10a-3p	395	402	418	483	534	496	1852.53	2187.93	1731.38	1752.4	2178.27	2145.13
hsa-miR-10a-5p	229587	262579	314108	369038	398170	370121	1.02994e+06	1.36698e+06	1.24449e+06	1.28071e+06	1.55358e+06	1.53112e+06
hsa-miR-10b-3p	157	149	151	183	216	151	736.322	810.95	625.451	663.952	881.099	653.053
hsa-miR-10b-5p	436274	403201	482923	627025	624335	578112	1.95714e+06	2.09906e+06	1.91333e+06	2.17603e+06	2.43603e+06	2.39154e+06
hsa-miR-11399	14	4	9	5	17	22	65.6593	21.7705	37.2786	18.1408	69.3457	95.1468
hsa-miR-1180-3p	463	394	527	467	377	405	2171.45	2144.39	2182.87	1694.35	1537.84	1751.57
hsa-miR-1185-1-3p	396	392	457	642	615	533	1857.22	2133.51	1892.92	2329.28	2508.68	2305.15
hsa-miR-1185-2-3p	84	79	123	126	133	81	393.956	429.967	509.474	457.148	542.528	350.313
hsa-miR-1185-5p	6	7	4	10	17	15	29.4797	39.9125	17.3572	38.0092	72.6479	67.962
hsa-miR-1197	119	89	144	136	177	183	584.681	507.459	624.86	516.926	756.393	829.137
hsa-miR-12135	1152	736	859	844	617	828	6603.45	4895.94	4348.7	3742.64	3076.14	4376.75
hsa-miR-12136	1698	1909	1319	2522	2643	2749	9733.21	12698.8	6677.46	11183.6	13177.1	14531
hsa-miR-1226-5p	10	12	12	6	17	4	39.6842	55.2635	42.0579	18.4199	58.6772	14.638
hsa-miR-1246	34	42	70	1480	790	1176	184.636	264.683	335.725	6217.51	3731.36	5889.09
hsa-miR-1249-5p	25	6	6	15	34	25	107.478	29.9344	22.7813	49.8871	127.134	99.1113
hsa-miR-1252-5p	6	10	7	9	14	9	28.1397	54.4262	28.9944	32.6534	57.1083	38.9237
hsa-miR-1255a	96	91	98	178	136	108	430.66	473.745	388.273	617.733	530.646	446.776
hsa-miR-1257	97	74	108	32	53	36	476.588	421.933	468.645	121.63	226.491	163.109
hsa-miR-125a-3p	761	556	968	724	681	804	3569.05	3026.1	4009.52	2626.78	2777.91	3477.18
hsa-miR-125a-5p	30256	22464	38616	14643	7848	13548	130074	112074	146621	48699.8	29345.5	53710.4
hsa-miR-125b-1-3p	5221	3473	6177	4283	3135	3793	24486.2	18902.2	25585.5	15539.4	12788.2	16404.2
hsa-miR-125b-2-3p	398	346	477	676	658	661	1866.6	1883.15	1975.76	2452.63	2684.09	2858.73
hsa-miR-125b-5p	14290	9800	15802	8741	5594	7199	67019.4	53337.7	65452.9	31713.7	22818.8	31134.6
hsa-miR-126-3p	130190	108450	131350	156752	154042	149149	610585	590252	544060	568721	628362	645048
hsa-miR-126-5p	672998	562404	685233	899200	871047	790070	3.30663e+06	3.20671e+06	2.97343e+06	3.41779e+06	3.72234e+06	3.57965e+06
hsa-miR-1260a	2838	2139	3143	2122	1144	1717	16267.9	14228.8	15911.5	9409.82	5703.57	9075.95
hsa-miR-1260b	502	509	499	653	303	398	2726.1	3207.71	2393.24	2743.27	1431.14	1993.08
hsa-miR-1261	7	11	15	9	2	6	38.0133	69.3218	71.9411	37.8092	9.44648	30.0464
hsa-miR-1262	58	45	53	51	47	44	272.017	244.918	219.529	185.036	191.721	190.294
hsa-miR-1266-5p	7	8	10	9	5	4	31.4023	41.6479	39.6197	31.2337	19.509	16.5473
hsa-miR-1267	5	14	9	7	3	8	24.5664	79.8251	39.0537	26.6065	12.8202	36.2464
hsa-miR-1268a	90	75	92	99	39	58	515.895	498.907	465.752	439.007	194.44	306.584
hsa-miR-1268b	99	86	103	90	37	79	510.736	514.872	469.296	359.187	166.022	375.83
hsa-miR-127-3p	47169	59053	64499	69918	80427	79397	221220	321403	267159	253673	328075	343381
hsa-miR-127-5p	66	88	113	151	172	143	309.537	478.95	468.053	547.851	701.616	618.454
hsa-miR-1271-5p	242	205	255	297	137	156	1134.97	1115.74	1056.23	1077.56	558.845	674.677
hsa-miR-1276	6	2	19	7	4	7	30.9537	11.9738	86.5691	27.9368	17.9483	33.3014
hsa-miR-1277-5p	42	39	36	52	57	44	180.563	194.574	136.688	172.942	213.136	174.436
hsa-miR-1278	11	4	15	9	14	7	51.5895	21.7705	62.1309	32.6534	57.1083	30.274
hsa-miR-128-1-5p	338	188	346	138	107	126	1516.28	978.725	1370.84	478.916	417.493	521.239
hsa-miR-128-3p	3242	2318	3515	3040	2408	2670	15928.9	13216.8	15252.7	11554.8	10290.4	12097.2
hsa-miR-1285-3p	729	679	704	820	740	741	3418.97	3695.54	2916.01	2975.09	3018.58	3204.72
hsa-miR-1285-5p	6	5	11	8	6	2	29.4797	28.509	47.7323	30.4074	25.6404	9.0616
hsa-miR-1286	5	3	8	8	5	14	24.5664	17.1054	34.7144	30.4074	21.367	63.4312
hsa-miR-1287-5p	43	48	52	52	59	65	201.668	261.246	215.387	188.664	240.671	281.116
hsa-miR-129-5p	6	4	11	2	10	7	29.4797	22.8072	47.7323	7.60185	42.7341	31.7156
hsa-miR-1290	1	1	2	35	18	24	5.43047	6.30198	9.59214	147.036	85.0183	120.185
hsa-miR-1292-5p	20	12	15	18	12	14	82.5432	57.4741	54.6752	57.47	43.0759	53.2822
hsa-miR-1293	5	3	4	4	5	4	23.4498	16.3279	16.5682	14.5126	20.3958	17.2994
hsa-miR-1294	37	13	13	48	26	24	173.528	70.754	53.8468	174.151	106.058	103.797
hsa-miR-1296-3p	10	7	11	4	5	2	46.8995	38.0983	45.5627	14.5126	20.3958	8.64971
hsa-miR-1296-5p	386	644	381	550	381	362	1810.32	3505.05	1578.13	1995.49	1554.16	1565.6
hsa-miR-1301-3p	111	106	159	188	169	145	477.203	528.841	603.706	625.252	631.93	574.845
hsa-miR-1303	32	47	38	71	52	56	150.078	255.803	157.398	257.599	212.116	242.192
hsa-miR-1304-3p	1436	723	1539	984	811	831	6734.77	3935.01	6374.63	3570.1	3308.2	3593.95
hsa-miR-1304-5p	7	7	5	12	6	9	32.8297	38.0983	20.7103	43.5379	24.475	38.9237
hsa-miR-1306-5p	14	13	15	20	17	17	65.6593	70.754	62.1309	72.5631	69.3457	73.5225
hsa-miR-1307-3p	902	719	1026	1052	968	958	4230.34	3913.24	4249.76	3816.82	3948.63	4143.21
hsa-miR-1307-5p	5691	6802	4504	6392	6933	5453	27961.5	38783.6	19544.2	24295.5	29627.5	24706.5
hsa-miR-130a-3p	4775	4169	5184	6926	7341	6147	22394.5	22690.3	21472.4	25128.6	29945.1	26584.9
hsa-miR-130b-3p	7025	6737	8002	8467	9710	8088	32946.9	36666.9	33144.8	30719.6	39608.7	34979.4
hsa-miR-130b-5p	230	146	337	61	59	76	1130.06	832.462	1462.35	231.856	252.131	344.341
hsa-miR-132-3p	99	51	157	56	83	96	464.305	277.574	650.304	203.177	338.57	415.186
hsa-miR-132-5p	15	12	30	17	18	15	70.3493	65.3114	124.262	61.6786	73.4249	64.8728
hsa-miR-134-3p	7	14	13	8	3	9	31.4023	72.8838	51.5056	27.7633	11.7054	37.2314
hsa-miR-134-5p	1167	1434	1644	1558	1518	1552	5473.17	7804.72	6809.55	5652.67	6192.17	6712.18
hsa-miR-1343-3p	13	8	6	2	1	2	60.9694	43.541	24.8524	7.25631	4.07916	8.64971
hsa-miR-136-3p	3898	4684	4940	5846	7462	6219	18281.4	25493.2	20461.8	21210.2	30438.7	26896.3
hsa-miR-136-5p	186	250	212	316	371	363	834.404	1301.5	839.938	1096.65	1447.57	1501.66
hsa-miR-137-3p	78	74	101	118	146	131	349.911	385.243	400.159	409.508	569.664	541.923
hsa-miR-138-1-3p	3	5	24	3	6	4	14.0699	27.2131	99.4095	10.8845	24.475	17.2994
hsa-miR-138-5p	25	183	189	35	183	212	112.151	952.695	748.813	121.464	714.031	877.005
hsa-miR-139-3p	4	9	3	11	8	7	17.9442	46.8539	11.8859	38.1745	31.2145	28.9577
hsa-miR-139-5p	79	69	104	145	97	119	354.397	359.213	412.045	503.209	378.475	492.281
hsa-miR-140-3p	59	58	74	89	88	81	289.884	330.704	321.108	338.282	376.06	366.995
hsa-miR-140-5p	92	60	128	128	137	123	431.476	326.557	530.184	464.404	558.845	531.957
hsa-miR-141-3p	24	25	13	14	32	11	112.559	136.065	53.8468	50.7942	130.533	47.5734
hsa-miR-142-5p	27	5	6	6	17	4	132.659	28.509	26.0358	22.8055	72.6479	18.1232
hsa-miR-143-3p	1036	1154	2330	1588	2214	2856	5090.16	6579.87	10110.6	6035.87	9461.32	12940
hsa-miR-145-5p	13	16	18	40	39	26	58.3185	83.2957	71.3155	138.816	152.17	107.557
hsa-miR-146a-3p	1	3	4	2	14	24	4.68995	16.3279	16.5682	7.25631	57.1083	103.797
hsa-miR-146a-5p	760	1994	4244	2265	10629	11985	3564.36	10852.6	17578.9	8217.77	43357.4	51833.4
hsa-miR-146b-3p	13	5	20	9	9	7	60.9694	27.2131	82.8412	32.6534	36.7125	30.274
hsa-miR-146b-5p	122	60	118	252	215	170	547.297	312.359	467.513	874.543	838.888	703.259
hsa-miR-147b-3p	8	9	10	6	11	8	39.3063	51.3161	43.393	22.8055	47.0075	36.2464
hsa-miR-148a-3p	7363	7872	12443	11937	16872	16939	34532.1	42844.3	51539.7	43309.3	68823.6	73258.7
hsa-miR-148a-5p	321	415	717	605	637	780	1505.47	2258.69	2969.86	2195.03	2598.43	3373.39
hsa-miR-148b-3p	1212	965	1419	1324	1485	1217	5684.22	5252.13	5877.59	4803.68	6057.55	5263.35
hsa-miR-148b-5p	33	22	20	33	29	20	154.768	119.738	82.8412	119.729	118.296	86.4971
hsa-miR-149-5p	272	478	354	444	542	370	1220.2	2488.46	1402.54	1540.86	2114.78	1530.62
hsa-miR-150-5p	12	9	9	7	7	4	56.2794	48.9836	37.2786	25.3971	28.5541	17.2994
hsa-miR-151a-3p	29303	21422	31185	33310	29896	28578	143974	122144	135321	126609	127758	129481
hsa-miR-151a-5p	30716	22893	32517	30426	33283	29463	150916	130531	141101	115647	142232	133491
hsa-miR-151b	55	36	62	62	88	72	315.269	239.475	313.876	274.934	438.736	380.587
hsa-miR-152-3p	44	57	71	50	63	67	216.184	325.002	308.091	190.046	269.225	303.564
hsa-miR-152-5p	44	55	94	96	85	88	197.386	286.329	372.425	333.159	331.654	364.04
hsa-miR-154-3p	14	40	10	42	40	25	65.6593	217.705	41.4206	152.383	163.166	108.121
hsa-miR-154-5p	30	69	54	101	110	99	140.699	375.541	223.671	366.444	448.708	428.161
hsa-miR-155-3p	6	4	3	6	1	1	28.1397	21.7705	12.4262	21.7689	4.07916	4.32486
hsa-miR-155-5p	43984	32726	48496	46322	52444	40647	189093	163272	184134	154058	196100	161143
hsa-miR-15a-5p	2660	2027	2787	2627	2939	2704	12475.3	11032.2	11543.9	9531.16	11988.7	11694.4
hsa-miR-15b-3p	278	267	228	349	209	240	1303.81	1453.18	944.39	1266.23	852.545	1037.97
hsa-miR-15b-5p	3313	2157	3681	3676	4346	3574	15537.8	11739.7	15246.9	13337.1	17728	15457
hsa-miR-16-2-3p	116	61	84	40	36	43	544.034	332	347.933	145.126	146.85	185.969
hsa-miR-16-5p	83199	44768	85245	57214	65166	57310	390199	243655	353090	207581	265823	247857
hsa-miR-17-3p	741	424	751	558	564	536	3475.25	2307.67	3110.69	2024.51	2300.65	2318.12
hsa-miR-17-5p	4796	3353	4808	2961	2466	2494	21515.1	17455.7	19049.2	10275.9	9621.86	10317.2
hsa-miR-181a-2-3p	4271	4011	6417	4814	6309	5310	20030.8	21830.3	26579.6	17465.9	25735.4	22965
hsa-miR-181a-3p	9954	8267	10443	5570	6930	5886	46683.8	44994.1	43255.6	20208.8	28268.6	25456.1
hsa-miR-181a-5p	162305	176919	229374	279133	374246	305411	728107	921037	908773	968706	1.46024e+06	1.26343e+06
hsa-miR-181b-2-3p	12	23	19	20	20	17	61.9074	137.698	86.5691	79.8194	89.7416	80.8748
hsa-miR-181b-3p	224	197	342	151	159	158	1100.58	1123.25	1484.04	573.94	679.472	715.867
hsa-miR-181b-5p	46062	38970	56490	59782	72972	59935	206636	202877	223812	207468	284723	247940
hsa-miR-181c-3p	102	126	146	201	204	203	478.375	685.77	604.741	729.259	832.149	877.946
hsa-miR-181c-5p	605	681	923	1377	1695	1456	2837.42	3706.42	3823.12	4995.97	6914.18	6296.99
hsa-miR-181d-5p	741	547	932	1055	1320	1052	3324.16	2847.67	3692.56	3661.28	5150.38	4351.93
hsa-miR-182-5p	324	305	535	688	557	552	1392.92	1521.67	2031.34	2288.16	2082.75	2188.38
hsa-miR-183-5p	20	11	12	20	15	15	93.799	59.8688	49.7047	72.5631	61.1874	64.8728
hsa-miR-184	256	70	10	2	3	2	1200.63	380.983	41.4206	7.25631	12.2375	8.64971
hsa-miR-1843	12	10	26	24	21	18	61.9074	59.8688	118.463	95.7833	94.2286	85.6321
hsa-miR-185-3p	51	46	48	61	56	60	239.188	250.36	198.819	221.317	228.433	259.491
hsa-miR-185-5p	35	82	25	112	60	85	164.148	446.295	103.552	406.353	244.75	367.613
hsa-miR-186-5p	29753	28675	36164	40916	47106	40436	139540	156067	149794	148450	192153	174880
hsa-miR-187-3p	7	8	13	7	8	4	32.8297	43.541	53.8468	25.3971	32.6333	17.2994
hsa-miR-188-3p	13	10	27	20	22	18	63.8727	57.0179	117.161	76.0185	94.015	81.5544
hsa-miR-188-5p	10	13	8	17	9	8	49.1328	74.1233	34.7144	64.6157	38.4607	36.2464
hsa-miR-18a-3p	221	161	245	119	61	82	991.415	838.163	970.683	412.979	238.01	339.219
hsa-miR-18a-5p	966	774	875	977	959	775	4333.52	4029.43	3466.73	3390.59	3741.83	3206.03
hsa-miR-1908-3p	7	8	10	110	146	109	34.393	45.6143	43.393	418.102	623.917	493.857
hsa-miR-1908-5p	9	21	19	14	21	12	44.2195	119.738	82.4468	53.2129	89.7416	54.3696
hsa-miR-190b-5p	19	22	24	27	36	34	89.1091	119.738	99.4095	97.9602	146.85	147.045
hsa-miR-191-3p	140	66	148	36	32	39	656.593	359.213	613.025	130.614	130.533	168.669
hsa-miR-191-5p	114605	116296	147548	148830	151321	148014	514123	605435	584581	516501	590425	612307
hsa-miR-1910-3p	7	2	7	5	4	7	36.1126	11.9738	31.8939	19.9549	17.9483	33.3014
hsa-miR-1910-5p	271	206	322	101	59	84	1331.5	1174.57	1397.26	383.893	252.131	380.587
hsa-miR-192-5p	4739	4016	5762	7135	6990	7297	23284	22898.4	25003.1	27119.6	29871.1	33061.3
hsa-miR-193a-3p	907	1469	886	1353	1053	1373	4253.79	7995.21	3669.87	4908.89	4295.36	5938.03
hsa-miR-193a-5p	55	71	105	67	56	57	257.947	386.426	434.917	243.086	228.433	246.517
hsa-miR-193b-3p	382	423	459	514	519	478	1791.56	2302.23	1901.21	1864.87	2117.08	2067.28
hsa-miR-193b-5p	12	3	6	11	13	18	56.2794	16.3279	24.8524	39.9097	53.0291	77.8474
hsa-miR-194-5p	111	81	173	117	106	160	520.585	440.852	716.577	424.494	432.391	691.977
hsa-miR-195-3p	178	164	251	123	122	91	834.811	892.59	1039.66	446.263	497.658	393.562
hsa-miR-195-5p	405	333	595	522	609	647	1989.88	1898.7	2581.89	1984.08	2602.51	2931.43
hsa-miR-196a-5p	31	3	9	44	8	7	145.389	16.3279	37.2786	159.639	32.6333	30.274
hsa-miR-196b-3p	6	10	8	13	15	15	28.1397	54.4262	33.1365	47.166	61.1874	64.8728
hsa-miR-196b-5p	2850	3213	4317	3956	4096	3800	13366.4	17487.1	17881.3	14353	16708.2	16434.5
hsa-miR-197-3p	234	246	292	255	150	191	1097.45	1338.88	1209.48	925.18	611.874	826.047
hsa-miR-197-5p	26	18	27	16	21	17	116.637	93.7077	106.973	55.5265	81.9379	70.3259
hsa-miR-1972	8	15	14	17	7	7	37.5196	81.6393	57.9889	61.6786	28.5541	30.274
hsa-miR-199a-3p	4940	5013	6112	7030	7105	7470	23168.4	27283.8	25316.3	25505.9	28982.4	32306.7
hsa-miR-199a-5p	1165	1031	1354	1094	931	926	5226.24	5367.37	5364.51	3796.63	3632.58	3830.69
hsa-miR-199b-3p	4917	5018	5992	6872	7268	7425	23060.5	27311.1	24819.2	24932.7	29647.3	32112.1
hsa-miR-199b-5p	18	12	9	10	12	16	80.7487	62.4718	35.6578	34.7041	46.8217	66.1891
hsa-miR-19a-3p	2760	3209	2434	4447	4380	3312	12381.5	16706	9643.44	15432.9	17089.9	13701.1
hsa-miR-19a-5p	51	28	38	36	32	35	239.188	152.393	157.398	130.614	130.533	151.37
hsa-miR-19b-1-5p	7	6	9	8	5	12	31.4023	31.2359	35.6578	27.7633	19.509	49.6418
hsa-miR-19b-3p	5769	7762	5269	12968	12786	9189	25880	40408.8	20875.6	45004.3	49888.5	38013.2
hsa-miR-204-5p	88	62	127	156	136	113	412.716	337.442	526.042	565.992	554.766	488.709
hsa-miR-20a-3p	12	4	5	6	5	3	56.2794	21.7705	20.7103	21.7689	20.3958	12.9746
hsa-miR-20a-5p	2842	2333	2626	2326	2156	1841	12749.3	12145.6	10404.1	8072.17	8412.3	7615.88
hsa-miR-21-3p	61758	57990	69459	76757	82419	66702	303435	330647	301404	291748	352210	302213
hsa-miR-21-5p	182179	174379	229724	274606	338000	282112	854411	949078	951531	996313	1.37876e+06	1.22009e+06
hsa-miR-210-3p	310	389	321	2098	1720	1201	1453.89	2117.18	1329.6	7611.87	7016.16	5194.15
hsa-miR-210-5p	13	7	18	19	6	5	60.9694	38.0983	74.5571	68.9349	24.475	21.6243
hsa-miR-2116-5p	6	8	9	10	6	9	29.4797	45.6143	39.0537	38.0092	25.6404	40.7772
hsa-miR-212-3p	28	13	34	27	50	43	137.572	74.1233	147.536	102.625	213.67	194.824
hsa-miR-212-5p	8	9	17	12	26	15	35.8883	46.8539	67.3535	41.6449	101.447	62.0523
hsa-miR-214-3p	311	308	580	441	276	436	1458.58	1676.33	2402.4	1600.02	1125.85	1885.64
hsa-miR-214-5p	192	136	208	153	116	159	900.471	740.196	861.549	555.108	473.183	687.652
hsa-miR-215-5p	22	14	28	40	41	40	108.092	79.8251	121.5	152.037	175.21	181.232
hsa-miR-216a-3p	119	263	259	175	307	197	558.104	1431.41	1072.79	634.927	1252.3	851.997
hsa-miR-216a-5p	418	847	723	569	1474	810	1960.4	4609.9	2994.71	2064.42	6012.68	3503.13
hsa-miR-216b-5p	27	35	46	12	17	11	126.629	190.492	190.535	43.5379	69.3457	47.5734
hsa-miR-217-3p	48	90	84	65	122	87	225.118	489.836	347.933	235.83	497.658	376.262
hsa-miR-217-5p	116	250	164	118	256	185	520.381	1301.5	649.763	409.508	998.863	765.311
hsa-miR-218-5p	539	361	658	598	649	705	2648.26	2058.35	2855.26	2272.95	2773.44	3194.21
hsa-miR-219a-1-3p	21	27	30	18	7	11	98.489	146.951	124.262	65.3068	28.5541	47.5734
hsa-miR-219b-3p	15	6	5	9	8	6	67.2906	31.2359	19.8099	31.2337	31.2145	24.8209
hsa-miR-22-3p	504634	470849	616514	580553	576114	614945	2.36671e+06	2.56265e+06	2.55364e+06	2.10634e+06	2.35006e+06	2.65955e+06
hsa-miR-22-5p	69	66	119	112	100	128	323.607	359.213	492.905	406.353	407.916	553.581
hsa-miR-221-3p	55398	58430	55614	74743	73087	60344	248518	304186	220341	259389	285171	249632
hsa-miR-221-5p	122	89	106	149	139	92	572.174	484.393	439.059	540.595	567.003	397.887
hsa-miR-222-3p	1719	1850	1873	3395	2969	2798	8445.93	10548.3	8127.51	12904.1	12687.7	12677.2
hsa-miR-222-5p	979	346	630	320	100	163	4591.46	1883.15	2609.5	1161.01	407.916	704.951
hsa-miR-224-3p	13	28	14	24	52	39	58.3185	145.768	55.4676	83.2898	202.894	161.336
hsa-miR-224-5p	2249	1298	2683	1768	1655	1551	9281.98	6216.78	9779.57	5644.83	5940.89	5902.91
hsa-miR-2276-3p	6	9	7	5	6	16	28.1397	48.9836	28.9944	18.1408	24.475	69.1977
hsa-miR-2277-5p	54	59	56	41	53	31	232.153	294.355	212.626	136.358	198.179	122.898
hsa-miR-2355-3p	10	12	12	13	12	11	46.8995	65.3114	49.7047	47.166	48.9499	47.5734
hsa-miR-2355-5p	62	45	83	66	67	86	304.624	256.581	360.162	250.861	286.318	389.649
hsa-miR-2392	336	387	432	598	468	339	1733.41	2316.92	1968.31	2386.6	2099.95	1612.74
hsa-miR-23a-3p	4913	3416	6137	7593	7038	7916	24139	19477.3	26630.3	28860.4	30076.2	35865.8
hsa-miR-23b-3p	2779	1972	3226	3350	2647	3359	12466.7	10266.2	12781.3	11625.9	10328.1	13895.6
hsa-miR-24-2-5p	18	17	34	31	32	28	84.4191	92.5245	140.83	112.473	130.533	121.096
hsa-miR-24-3p	1308	1109	1489	2082	2352	2352	6134.46	6035.86	6167.53	7553.82	9594.19	10172.1
hsa-miR-2467-5p	161	160	150	216	160	185	722.253	832.957	594.296	749.608	624.289	765.311
hsa-miR-25-3p	37631	26667	39280	36572	36535	32521	176488	145138	162700	132689	149032	140649
hsa-miR-25-5p	75	66	66	46	59	56	368.496	376.318	286.394	174.843	252.131	253.725
hsa-miR-2682-5p	123	108	198	84	103	93	551.783	562.246	784.471	291.514	401.886	384.724
hsa-miR-26a-1-3p	21	18	20	27	23	18	98.489	97.9671	82.8412	97.9602	93.8207	77.8474
hsa-miR-26a-2-3p	47	25	43	21	23	19	220.428	136.065	178.109	76.1913	93.8207	82.1723
hsa-miR-26a-5p	105905	101068	128416	140752	146062	137126	496689	550075	531907	510670	595810	593050
hsa-miR-26b-3p	25	30	35	19	23	24	122.832	171.054	151.876	72.2176	98.2884	108.739
hsa-miR-26b-5p	959	928	1059	1492	1751	1500	4711.84	5291.26	4595.32	5670.98	7482.74	6796.2
hsa-miR-27a-3p	67651	47592	88977	94877	98433	109340	332389	271360	386098	360620	420644	495398
hsa-miR-27a-5p	1887	1211	1912	1041	934	1123	8849.94	6591.01	7919.62	3776.91	3809.94	4856.81
hsa-miR-27b-3p	100768	96936	157371	235424	262791	273281	495102	552709	682880	894829	1.12301e+06	1.23818e+06
hsa-miR-27b-5p	1774	1531	1820	1056	1080	832	8319.97	8332.65	7538.55	3831.33	4405.49	3598.28
hsa-miR-28-3p	21902	17429	22782	18093	16764	16693	102719	94859.4	94364.5	65644.2	68383.1	72194.8
hsa-miR-28-5p	2525	2376	3139	2192	2290	2571	11842.1	12931.7	13001.9	7952.92	9341.28	11119.2
hsa-miR-296-3p	23	44	28	34	60	39	107.869	239.475	115.978	123.357	244.75	168.669
hsa-miR-296-5p	10	11	5	5	10	5	49.1328	62.7197	21.6965	19.0046	42.7341	22.654
hsa-miR-299-3p	611	611	714	1002	1087	1001	2865.56	3325.44	2957.43	3635.41	4434.05	4329.18
hsa-miR-29a-3p	15353	12921	17342	15278	15457	14539	82934.6	78053.8	80568.9	66464.6	69862.8	71960.8
hsa-miR-29a-5p	18	21	21	23	26	38	84.4191	114.295	86.9833	83.4476	106.058	164.345
hsa-miR-29b-1-5p	10	15	16	14	5	11	42.9912	74.836	60.7502	46.5613	18.6962	43.609
hsa-miR-29b-3p	880	778	891	792	800	585	3947.72	4050.26	3530.12	2748.56	3121.45	2420.04
hsa-miR-29c-3p	533	494	582	754	640	643	2499.74	2688.65	2410.68	2735.63	2610.66	2780.88
hsa-miR-301a-3p	3107	3278	4193	5216	5727	4713	13938.1	17065.2	16612.6	18101.7	22345.6	19496.8
hsa-miR-301a-5p	30	31	38	17	23	15	140.699	168.721	157.398	61.6786	93.8207	64.8728
hsa-miR-301b-3p	1410	1629	2226	2289	2759	2156	6325.32	8480.55	8819.35	7943.77	10765.1	8918.98
hsa-miR-3065-3p	6	8	17	15	6	13	26.9162	41.6479	67.3535	52.0561	23.4108	53.7786
hsa-miR-3065-5p	32	43	48	52	62	32	143.553	223.857	190.175	180.461	241.912	132.378
hsa-miR-3074-5p	744	701	898	1357	1590	1396	3655.48	3996.96	3896.69	5157.85	6794.72	6325
hsa-miR-3085-3p	123	118	92	172	92	91	604.334	672.811	399.216	653.759	393.153	412.303
hsa-miR-3085-5p	24	20	18	37	16	19	99.0518	95.7901	65.6103	118.133	57.4346	72.3116
hsa-miR-30a-3p	10669	9353	10250	10112	9225	8508	50037.1	50904.8	42456.1	36687.9	37630.3	36795.9
hsa-miR-30a-5p	4885	4233	5718	8702	8805	7535	22910.4	23038.6	23684.3	31572.2	35917	32587.8
hsa-miR-30b-3p	10	16	21	21	19	26	46.8995	87.0819	86.9833	76.1913	77.5041	112.446
hsa-miR-30b-5p	1245	1666	1617	2367	1937	1959	5838.99	9067.4	6697.71	8587.84	7901.34	8472.39
hsa-miR-30c-1-3p	357	231	426	332	250	286	1674.31	1257.25	1764.52	1204.55	1019.79	1236.91
hsa-miR-30c-2-3p	1290	1152	1497	1200	1215	1148	6050.04	6269.9	6200.67	4353.79	4956.18	4964.93
hsa-miR-30c-5p	935	944	1101	1043	916	928	4194.45	4914.45	4362.13	3619.64	3574.05	3838.97
hsa-miR-30d-3p	640	555	577	643	539	475	3001.57	3020.65	2389.97	2332.9	2198.67	2054.31
hsa-miR-30d-5p	591	510	865	598	580	622	2771.76	2775.74	3582.88	2169.64	2365.91	2690.06
hsa-miR-30e-3p	2451	1551	2528	1930	1697	1636	11495.1	8441.5	10471.1	7002.34	6922.34	7075.46
hsa-miR-30e-5p	82	88	110	152	163	156	384.576	478.95	455.627	551.48	664.903	674.677
hsa-miR-31-3p	6	14	10	40	36	25	28.1397	76.1967	41.4206	145.126	146.85	108.121
hsa-miR-31-5p	4610	4249	4607	6554	6510	5512	22650.2	24226.9	19991.2	24911.3	27819.9	24973.8
hsa-miR-3117-3p	3	6	9	16	40	30	14.7398	34.2107	39.0537	60.8148	170.936	135.924
hsa-miR-3120-3p	12	15	26	28	27	30	58.9594	85.5269	112.822	106.426	115.382	135.924
hsa-miR-3120-5p	7	11	19	15	20	14	34.393	62.7197	82.4468	57.0139	85.4681	63.4312
hsa-miR-3127-5p	11	4	5	12	17	16	49.3465	20.8239	19.8099	41.6449	66.3307	66.1891
hsa-miR-3129-3p	17	2	16	19	8	21	79.7292	10.8852	66.273	68.9349	32.6333	90.822
hsa-miR-3130-3p	12	12	18	15	17	17	58.9594	68.4215	78.1075	57.0139	72.6479	77.0236
hsa-miR-3135b	205	282	345	234	267	319	961.44	1534.82	1429.01	848.988	1089.14	1379.63
hsa-miR-3136-5p	7	5	5	11	23	7	31.4023	26.0299	19.8099	38.1745	89.7416	28.9577
hsa-miR-3138	6	6	9	15	5	9	25.7947	29.9344	34.172	49.8871	18.6962	35.6801
hsa-miR-3145-3p	4	6	9	6	11	6	17.1965	29.9344	34.172	19.9549	41.1315	23.7867
hsa-miR-3152-5p	167	74	169	66	52	44	783.222	402.754	700.008	239.458	212.116	190.294
hsa-miR-3155a	9	11	8	10	11	6	44.2195	62.7197	34.7144	38.0092	47.0075	27.1848
hsa-miR-3158-3p	107	69	90	72	34	70	501.825	375.541	372.786	261.227	138.691	302.74
hsa-miR-3161	12	10	22	11	7	16	53.8325	52.0598	87.1634	38.1745	27.3126	66.1891
hsa-miR-3173-3p	5	3	4	7	8	3	23.4498	16.3279	16.5682	25.3971	32.6333	12.9746
hsa-miR-3174	65	56	66	61	68	48	291.593	291.535	261.49	211.695	265.323	198.567
hsa-miR-3175	7	13	9	4	7	13	32.8297	70.754	37.2786	14.5126	28.5541	56.2231
hsa-miR-3177-3p	41	32	50	30	36	37	201.445	182.457	216.965	114.028	153.843	167.64
hsa-miR-3180-3p	31	7	15	29	12	7	145.389	38.0983	62.1309	105.216	48.9499	30.274
hsa-miR-3184-3p	9464	7951	13647	16701	15360	17100	42455.9	41392.8	54069	57959.3	59931.8	70739.6
hsa-miR-3184-5p	2289	1925	2792	2420	2244	2071	9840.69	9603.96	10600.9	8048.46	8390.84	8210.38
hsa-miR-3194-5p	36	37	20	50	57	34	176.878	210.966	86.7861	190.046	243.584	154.047
hsa-miR-32-3p	53	35	42	43	41	48	248.567	190.492	173.967	156.011	167.246	207.593
hsa-miR-32-5p	90	97	104	133	176	150	422.096	527.934	430.774	482.545	717.932	648.728
hsa-miR-3200-3p	97	93	115	145	171	111	454.925	506.164	476.337	526.082	697.537	480.059
hsa-miR-320a-3p	7233	7602	8585	14696	13855	12089	33922.4	41374.8	35559.6	53319.4	56516.8	52283.2
hsa-miR-320b	890	997	1124	2389	2787	1988	4174.06	5426.29	4655.68	8667.66	11368.6	8597.81
hsa-miR-320c	33	42	46	108	122	75	170.245	251.449	209.588	431.025	547.423	356.801
hsa-miR-320d	17	10	15	45	42	31	92.318	63.0198	71.9411	189.046	198.376	155.24
hsa-miR-323a-3p	311	355	402	476	489	452	1528.03	2024.14	1744.4	1809.24	2089.7	2047.92
hsa-miR-323b-3p	136	221	205	170	164	207	637.833	1202.82	849.123	616.786	668.982	895.245
hsa-miR-324-3p	257	221	294	241	148	185	1152.91	1150.52	1164.82	836.369	577.467	765.311
hsa-miR-324-5p	63	61	77	97	86	93	295.467	332	318.939	351.931	350.808	402.212
hsa-miR-326	16	50	28	14	13	20	82.5432	299.344	127.576	55.8736	58.332	95.1468
hsa-miR-328-3p	106	138	107	96	65	97	497.135	751.081	443.201	348.303	265.145	419.511
hsa-miR-329-3p	45	83	82	154	196	142	211.048	451.737	339.649	558.736	799.516	614.129
hsa-miR-329-5p	24	6	8	10	14	13	107.665	31.2359	31.6958	34.7041	54.6253	53.7786
hsa-miR-330-3p	44	35	59	37	48	41	197.386	182.209	233.756	128.405	187.287	169.61
hsa-miR-330-5p	73	60	88	68	72	83	342.366	326.557	364.501	246.715	293.7	358.963
hsa-miR-331-3p	222	245	325	236	161	169	1090.75	1396.94	1410.27	897.018	688.019	765.705
hsa-miR-331-5p	138	102	134	136	99	111	647.213	555.147	555.036	493.429	403.837	480.059
hsa-miR-335-3p	2828	981	2122	971	522	567	13263.2	5339.21	8789.46	3522.94	2129.32	2452.19
hsa-miR-335-5p	998	477	917	764	599	725	4477.07	2483.25	3633.13	2651.39	2337.18	2999.19
hsa-miR-337-3p	54	78	83	67	70	63	253.257	424.524	343.791	243.086	285.541	272.466
hsa-miR-337-5p	32	33	26	47	54	59	157.225	188.159	112.822	178.643	230.764	267.317
hsa-miR-338-3p	22	15	23	27	19	28	103.179	81.6393	95.2674	97.9602	77.5041	121.096
hsa-miR-338-5p	16	31	9	13	9	15	75.0392	168.721	37.2786	47.166	36.7125	64.8728
hsa-miR-339-3p	1145	791	1259	725	656	776	5136.52	4117.93	4988.12	2516.05	2559.59	3210.17
hsa-miR-339-5p	476	490	535	647	490	522	2135.36	2550.93	2119.66	2245.35	1911.89	2159.42
hsa-miR-33a-3p	5	6	5	8	7	7	23.4498	32.6557	20.7103	29.0252	28.5541	30.274
hsa-miR-33a-5p	65	84	67	95	104	78	319.363	478.95	290.733	361.088	444.434	353.402
hsa-miR-33b-3p	97	76	103	32	36	45	454.925	413.639	426.632	116.101	146.85	194.618
hsa-miR-33b-5p	140	223	236	373	449	355	722.253	1335.07	1075.28	1488.63	2014.7	1688.86
hsa-miR-340-3p	2	8	12	14	12	12	9.3799	43.541	49.7047	50.7942	48.9499	51.8983
hsa-miR-340-5p	4527	4454	4158	5591	6481	5352	21231.4	24241.4	17222.7	20285	26437	23146.6
hsa-miR-342-3p	160	206	187	244	247	218	717.767	1072.43	740.889	846.78	963.746	901.826
hsa-miR-345-3p	4	5	9	6	4	3	18.7598	27.2131	37.2786	21.7689	16.3166	12.9746
hsa-miR-345-5p	9530	10103	13210	10101	9618	10710	44695.2	54986.8	54716.6	36648	39233.4	46319.2
hsa-miR-34a-3p	171	179	169	132	163	137	801.982	974.229	700.008	478.916	664.903	592.505
hsa-miR-34a-5p	1299	2059	1525	1854	2272	1918	6092.25	11206.4	6316.64	6726.6	9267.85	8295.07
hsa-miR-34c-5p	35	88	82	97	142	140	157.011	458.127	324.882	336.63	554.057	579.155
hsa-miR-3529-3p	27	19	28	14	14	9	116.076	94.7923	106.313	46.5613	52.3492	35.6801
hsa-miR-3605-3p	29	18	32	2	1	2	130.095	93.7077	126.783	6.94082	3.90181	8.27364
hsa-miR-3605-5p	23	36	26	38	51	39	103.179	187.415	103.011	131.876	198.992	161.336
hsa-miR-361-3p	119	141	164	144	97	126	533.839	734.044	649.763	499.739	378.475	521.239
hsa-miR-361-5p	1002	991	1229	1188	1470	1327	4699.33	5393.64	5090.59	4310.25	5996.37	5739.08
hsa-miR-3613-3p	21	11	8	22	10	22	90.2816	54.8797	30.3751	73.1678	37.3923	87.2179
hsa-miR-3613-5p	42	23	28	50	35	19	196.978	125.18	115.978	181.408	142.771	82.1723
hsa-miR-3614-5p	51	39	90	23	19	18	228.788	203.033	356.578	79.8194	74.1343	74.4627
hsa-miR-3615	33	9	25	26	12	9	162.138	51.3161	108.483	98.824	51.2809	40.7772
hsa-miR-362-3p	13	11	9	19	29	20	60.9694	59.8688	37.2786	68.9349	118.296	86.4971
hsa-miR-362-5p	35	43	37	60	45	35	150.469	214.53	140.485	199.549	168.265	138.756
hsa-miR-3620-5p	17	11	16	11	14	15	79.7292	59.8688	66.273	39.9097	57.1083	64.8728
hsa-miR-363-3p	24	24	31	39	29	19	112.559	130.623	128.404	141.498	118.296	82.1723
hsa-miR-3651	2	5	8	11	8	13	8.59825	24.9453	30.3751	36.5839	29.9139	51.5379
hsa-miR-365a-3p	197	142	211	98	80	90	923.921	772.852	873.975	355.559	326.333	389.237
hsa-miR-365a-5p	4	6	4	5	4	2	17.9442	31.2359	15.8479	17.352	15.6072	8.27364
hsa-miR-365b-3p	159	130	194	92	62	95	745.702	707.54	803.56	333.79	252.908	410.861
hsa-miR-365b-5p	31	20	28	33	22	37	145.389	108.852	115.978	119.729	89.7416	160.02
hsa-miR-3661	115	58	80	126	80	70	539.344	315.672	331.365	457.148	326.333	302.74
hsa-miR-3662	17	14	19	4	3	13	73.0851	69.8469	72.1409	13.3032	11.2177	51.5379
hsa-miR-3675-5p	7	5	3	4	5	4	31.4023	26.0299	11.8859	13.8816	19.509	16.5473
hsa-miR-3677-3p	127	141	150	152	142	117	595.624	767.409	621.309	551.48	579.241	506.008
hsa-miR-3679-5p	11	7	16	12	15	10	49.3465	36.4419	63.3916	41.6449	58.5271	41.3682
hsa-miR-3688-3p	14	14	16	29	24	21	65.6593	76.1967	66.273	105.216	97.8999	90.822
hsa-miR-369-3p	456	355	519	516	633	567	2240.46	2024.14	2252.1	1961.28	2705.07	2568.96
hsa-miR-369-5p	397	297	522	391	393	434	1861.91	1616.46	2162.16	1418.61	1603.11	1876.99
hsa-miR-3691-5p	6	2	3	7	6	7	26.9162	10.412	11.8859	24.2929	23.4108	28.9577
hsa-miR-370-3p	835	1034	998	1358	1407	1347	3916.11	5627.67	4133.78	4927.03	5739.38	5825.58
hsa-miR-370-5p	10	3	4	8	9	6	46.8995	16.3279	16.5682	29.0252	36.7125	25.9491
hsa-miR-374a-3p	3568	2255	2714	2623	2705	2290	16733.7	12273.1	11241.6	9516.65	11034.1	9903.92
hsa-miR-374a-5p	1065	805	1034	1282	1516	1213	4994.8	4381.31	4282.89	4651.29	6184.01	5246.05
hsa-miR-374b-3p	237	182	254	156	170	140	1111.52	990.557	1052.08	565.992	693.457	605.48
hsa-miR-374b-5p	234	265	262	459	579	403	1097.45	1442.29	1085.22	1665.32	2361.83	1742.92
hsa-miR-374c-3p	202	249	259	459	582	449	947.37	1355.21	1072.79	1665.32	2374.07	1941.86
hsa-miR-375-3p	7	2	8	1	3	3	32.8297	10.8852	33.1365	3.62816	12.2375	12.9746
hsa-miR-376a-3p	138	159	146	226	270	223	678.033	906.585	633.538	859.009	1153.82	1010.37
hsa-miR-376a-5p	28	35	58	19	23	48	131.319	190.492	240.24	68.9349	93.8207	207.593
hsa-miR-376b-3p	213	207	204	312	295	261	998.96	1126.62	844.981	1131.98	1203.35	1128.79
hsa-miR-376c-3p	350	437	445	618	646	630	1719.65	2491.68	1930.99	2348.97	2760.62	2854.4
hsa-miR-377-3p	122	121	138	168	196	182	572.174	658.557	571.605	609.53	799.516	787.124
hsa-miR-377-5p	96	88	126	127	97	130	450.235	478.95	521.9	460.776	395.679	562.231
hsa-miR-378a-3p	9426	7919	7691	10394	8941	7202	44207.5	43100.1	31856.6	37711	36471.8	31147.6
hsa-miR-378a-5p	20	19	25	18	9	14	93.799	103.41	103.552	65.3068	36.7125	60.548
hsa-miR-378c	105	106	96	177	162	118	433.352	507.688	349.921	565.121	581.525	449.093
hsa-miR-378d	12	17	8	29	19	12	61.9074	101.777	36.4501	115.738	85.2545	57.0881
hsa-miR-379-3p	189	149	233	167	146	148	886.401	810.95	965.1	605.902	595.558	640.079
hsa-miR-379-5p	64	80	48	61	44	68	314.45	456.143	208.287	231.856	188.03	308.094
hsa-miR-380-3p	131	90	144	59	107	83	614.384	489.836	596.457	214.061	436.47	358.963
hsa-miR-381-3p	13596	12621	14957	16338	16873	14913	63764.6	68691.3	61952.8	59276.8	68827.7	64496.6
hsa-miR-382-3p	96	150	116	207	206	214	471.675	855.269	503.359	786.791	880.322	969.591
hsa-miR-382-5p	159	236	232	257	239	255	745.702	1284.46	960.958	932.436	974.92	1102.84
hsa-miR-3909	115	110	159	99	99	103	539.344	598.688	658.588	359.187	403.837	445.46
hsa-miR-3912-3p	8	12	4	10	11	9	39.3063	68.4215	17.3572	38.0092	47.0075	40.7772
hsa-miR-3913-3p	5	7	4	13	10	7	23.4498	38.0983	16.5682	47.166	40.7916	30.274
hsa-miR-3913-5p	2	3	8	6	5	7	9.3799	16.3279	33.1365	21.7689	20.3958	30.274
hsa-miR-3916	7	10	8	21	13	24	27.7789	46.0529	28.0386	64.4695	44.8708	87.8278
hsa-miR-3918	9	5	7	8	4	5	44.2195	28.509	30.3751	30.4074	17.0936	22.654
hsa-miR-3928-3p	5	2	6	5	3	5	23.4498	10.8852	24.8524	18.1408	12.2375	21.6243
hsa-miR-3934-5p	24	19	28	26	28	28	112.559	103.41	115.978	94.332	114.217	121.096
hsa-miR-3938	50	40	49	54	46	34	234.498	217.705	202.961	195.92	187.641	147.045
hsa-miR-3939	13	14	19	5	10	7	60.9694	76.1967	78.6992	18.1408	40.7916	30.274
hsa-miR-3940-3p	9	5	12	22	20	15	42.2096	27.2131	49.7047	79.8194	81.5832	64.8728
hsa-miR-3940-5p	7	4	4	12	2	3	36.1126	23.9475	18.2251	47.8916	8.97416	14.272
hsa-miR-3944-3p	25	10	12	26	17	15	112.151	52.0598	47.5437	90.2306	66.3307	62.0523
hsa-miR-3960	28	19	11	99	107	110	144.451	113.751	50.119	395.106	480.117	523.307
hsa-miR-409-3p	7847	8525	9262	8700	8534	7811	36802.1	46398.3	38363.8	31564.9	34811.6	33781.4
hsa-miR-409-5p	313	340	338	396	447	266	1404.13	1770.03	1339.15	1374.28	1744.11	1100.39
hsa-miR-410-3p	8944	8290	10483	9888	13032	11442	43944.4	47267.9	45488.9	37583.5	55691	51841.4
hsa-miR-410-5p	10	5	7	12	14	18	49.1328	28.509	30.3751	45.6111	59.8277	81.5544
hsa-miR-411-3p	285	241	329	190	209	224	1336.64	1311.67	1362.74	689.349	852.545	968.768
hsa-miR-411-5p	11287	11136	15660	14707	17676	17756	55456.2	63495.2	67953.5	55900.2	75536.7	80448.9
hsa-miR-412-5p	81	59	87	113	63	102	363.369	307.153	344.692	392.156	245.814	421.955
hsa-miR-421	3692	2638	4228	3745	4926	4333	16562.5	13733.4	16751.2	12996.7	19220.3	17924.8
hsa-miR-423-3p	20311	13775	20390	11274	8913	8622	91116	71712.4	80784.6	39125.4	34776.8	35667.6
hsa-miR-423-5p	9506	8083	13590	16423	15364	16900	42644.3	42080	53843.2	56994.5	59947.4	69912.2
hsa-miR-424-3p	616	512	537	562	523	529	3026.58	2919.32	2330.21	2136.12	2234.99	2396.79
hsa-miR-424-5p	2125	3251	2287	6928	3854	4717	9966.15	17694	9472.9	25135.9	15721.1	20400.3
hsa-miR-425-3p	20	41	43	28	34	46	93.799	223.147	178.109	101.588	138.691	198.943
hsa-miR-425-5p	581	558	758	497	552	529	2606.39	2904.94	3003.18	1724.79	2153.8	2188.38
hsa-miR-431-3p	30	34	53	64	64	67	140.699	185.049	219.529	232.202	261.066	289.765
hsa-miR-431-5p	957	744	1173	632	645	709	4702.01	4242.13	5090	2402.18	2756.35	3212.34
hsa-miR-432-5p	1618	2089	2571	2432	2549	3104	7258.41	10875.3	10186.2	8440.04	9945.71	12840.7
hsa-miR-433-3p	142	138	215	139	139	130	665.973	751.081	890.543	504.314	567.003	562.231
hsa-miR-433-5p	9	8	4	12	4	12	42.2096	43.541	16.5682	43.5379	16.3166	51.8983
hsa-miR-4435	99	77	92	64	39	54	464.305	419.082	381.07	232.202	159.087	233.542
hsa-miR-4448	582	495	973	362	295	339	3002.51	2963.51	4433.25	1444.73	1323.69	1612.74
hsa-miR-4454	50	71	88	134	76	90	257.947	425.069	400.952	534.79	341.018	428.161
hsa-miR-4474-3p	5	3	4	10	5	8	23.4498	16.3279	16.5682	36.2816	20.3958	34.5988
hsa-miR-4485-3p	160	102	102	98	66	54	825.432	610.662	464.739	391.115	296.147	256.896
hsa-miR-4488	1	8	2	12	18	15	5.73216	53.2167	10.125	53.2129	89.7416	79.289
hsa-miR-449a	10	4	9	11	22	16	46.8995	21.7705	37.2786	39.9097	89.7416	69.1977
hsa-miR-449c-5p	6	6	4	21	19	20	24.7629	28.737	14.5801	67.0483	68.2036	76.1175
hsa-miR-450a-2-3p	9	7	9	5	7	3	42.2096	38.0983	37.2786	18.1408	28.5541	12.9746
hsa-miR-450a-5p	440	349	477	418	414	433	2063.58	1899.47	1975.76	1516.57	1688.77	1872.66
hsa-miR-450b-5p	976	574	983	718	843	736	4577.39	3124.06	4071.65	2605.02	3438.73	3183.09
hsa-miR-4510	10	7	2	15	11	8	46.8995	38.0983	8.28412	54.4223	44.8708	34.5988
hsa-miR-4511	7	10	17	4	5	4	32.8297	54.4262	70.4151	14.5126	20.3958	17.2994
hsa-miR-452-5p	28	27	29	62	61	42	131.319	146.951	120.12	224.946	248.829	181.644
hsa-miR-4523	8	8	6	6	6	2	39.3063	45.6143	26.0358	22.8055	25.6404	9.0616
hsa-miR-4529-5p	8	9	10	12	21	22	37.5196	48.9836	41.4206	43.5379	85.6624	95.1468
hsa-miR-454-3p	411	399	454	774	653	557	1843.76	2077.19	1798.74	2686.1	2547.88	2304.21
hsa-miR-454-5p	200	148	237	149	135	101	937.99	805.508	981.669	540.595	550.687	436.81
hsa-miR-455-3p	35	24	34	41	34	44	171.965	136.843	147.536	155.838	145.296	199.355
hsa-miR-455-5p	1181	1398	1427	1517	1933	1648	5538.83	7608.78	5910.72	5503.91	7885.02	7127.36
hsa-miR-4634	81	162	104	119	98	60	439.868	1020.92	498.791	499.922	462.877	300.464
hsa-miR-4638-3p	8	5	9	8	7	6	35.8883	26.0299	35.6578	27.7633	27.3126	24.8209
hsa-miR-4645-3p	82	75	112	113	145	172	384.576	408.196	463.911	409.982	591.478	743.875
hsa-miR-4661-5p	26	8	28	14	13	14	121.939	43.541	115.978	50.7942	53.0291	60.548
hsa-miR-4662a-5p	38	10	35	19	11	20	178.218	54.4262	144.972	68.9349	44.8708	86.4971
hsa-miR-4677-3p	960	798	1050	895	962	976	4502.35	4343.21	4349.17	3247.2	3924.15	4221.06
hsa-miR-4677-5p	28	11	17	19	20	14	131.319	59.8688	70.4151	68.9349	81.5832	60.548
hsa-miR-4707-3p	8	13	9	10	10	12	37.5196	70.754	37.2786	36.2816	40.7916	51.8983
hsa-miR-4717-5p	6	5	9	11	5	5	28.1397	27.2131	37.2786	39.9097	20.3958	21.6243
hsa-miR-4741	49	24	24	65	42	34	219.816	124.944	95.0873	225.577	163.876	140.652
hsa-miR-4742-3p	3	2	2	6	2	5	13.4581	10.412	7.92394	20.8225	7.80361	20.6841
hsa-miR-4745-5p	39	33	37	22	31	21	174.956	171.797	146.593	76.349	120.956	86.8732
hsa-miR-4746-5p	111	70	75	26	15	20	497.951	364.419	297.148	90.2306	58.5271	82.7364
hsa-miR-4758-3p	7	2	4	3	2	4	31.4023	10.412	15.8479	10.4112	7.80361	16.5473
hsa-miR-4775	153	104	159	119	112	109	717.563	566.032	658.588	431.75	456.866	471.409
hsa-miR-4785	7	6	6	18	16	18	34.393	34.2107	26.0358	68.4166	68.3745	81.5544
hsa-miR-4786-5p	5	4	6	8	7	3	23.4498	21.7705	24.8524	29.0252	28.5541	12.9746
hsa-miR-484	2204	1428	2241	1457	853	1029	10336.7	7772.06	9282.36	5286.22	3479.52	4450.28
hsa-miR-485-3p	97	124	137	78	50	72	454.925	674.885	567.462	282.996	203.958	311.39
hsa-miR-485-5p	78	101	138	105	116	143	365.816	549.705	571.605	380.956	473.183	618.454
hsa-miR-486-3p	71	58	71	46	30	59	348.843	330.704	308.091	174.843	128.202	267.317
hsa-miR-486-5p	3804	3194	3673	2216	2380	2090	17840.6	17383.7	15213.8	8039.99	9708.4	9038.95
hsa-miR-487a-3p	303	234	363	308	405	349	1421.06	1273.57	1503.57	1117.47	1652.06	1509.37
hsa-miR-487a-5p	2	3	2	9	7	9	9.3799	16.3279	8.28412	32.6534	28.5541	38.9237
hsa-miR-487b-3p	639	551	914	591	636	802	2996.88	2998.88	3785.84	2144.24	2594.35	3468.53
hsa-miR-491-3p	9	6	6	5	9	4	42.2096	32.6557	24.8524	18.1408	36.7125	17.2994
hsa-miR-493-3p	565	490	617	559	417	459	2649.82	2666.88	2555.65	2028.14	1701.01	1985.11
hsa-miR-493-5p	1003	684	1097	1033	890	947	4704.02	3722.75	4543.84	3747.88	3630.45	4095.64
hsa-miR-494-3p	22	33	26	91	148	122	103.179	179.606	107.694	330.162	603.716	527.632
hsa-miR-494-5p	12	13	8	17	16	20	53.8325	67.6778	31.6958	58.997	62.4289	82.7364
hsa-miR-495-3p	50	58	60	81	58	78	234.498	315.672	248.524	293.881	236.591	337.339
hsa-miR-496	30	17	41	39	31	39	140.699	92.5245	169.825	141.498	126.454	168.669
hsa-miR-497-5p	546	841	834	1011	984	1171	2682.65	4795.21	3618.98	3842.73	4205.03	5305.57
hsa-miR-5000-3p	10	2	5	4	6	4	46.8995	10.8852	20.7103	14.5126	24.475	17.2994
hsa-miR-5001-3p	5	1	13	9	8	3	23.4498	5.44262	53.8468	32.6534	32.6333	12.9746
hsa-miR-5002-5p	27	11	31	19	16	20	116.076	54.8797	117.704	63.1904	59.8277	79.289
hsa-miR-500a-3p	589	511	636	629	594	473	2762.38	2781.18	2634.35	2282.11	2423.02	2045.66
hsa-miR-500a-5p	7	16	11	26	27	27	31.4023	83.2957	43.5817	90.2306	105.349	111.694
hsa-miR-501-3p	1390	1106	1288	1445	1287	978	6519.03	6019.54	5334.98	5242.68	5249.88	4229.71
hsa-miR-502-3p	184	159	216	235	237	190	862.951	865.376	894.685	852.616	966.761	821.723
hsa-miR-503-3p	16	15	11	5	2	2	71.7767	78.0898	43.5817	17.352	7.80361	8.27364
hsa-miR-503-5p	172	164	202	211	248	243	771.599	853.781	800.318	732.256	967.648	1005.25
hsa-miR-505-3p	149	146	194	140	106	150	698.803	794.622	803.56	507.942	432.391	648.728
hsa-miR-5189-5p	11	8	5	14	13	8	47.2903	39.9125	18.9845	46.5613	48.61	31.7156
hsa-miR-532-3p	42	33	66	62	54	51	196.978	179.606	273.376	224.946	220.275	220.568
hsa-miR-532-5p	1998	1946	2213	3304	3365	2855	9370.52	10591.3	9166.38	11987.4	13726.4	12347.5
hsa-miR-539-3p	580	468	628	698	850	670	2720.17	2547.15	2601.21	2532.45	3467.29	2897.65
hsa-miR-541-3p	23	20	22	16	24	16	107.869	108.852	91.1254	58.0505	97.8999	69.1977
hsa-miR-541-5p	47	41	75	57	53	49	193.976	196.37	273.376	181.988	190.252	186.488
hsa-miR-542-3p	209	216	170	313	396	280	980.2	1175.61	704.151	1135.61	1615.35	1210.96
hsa-miR-542-5p	35	43	46	45	53	43	157.011	223.857	182.251	156.168	206.796	177.883
hsa-miR-543	164	81	161	136	105	110	769.152	440.852	666.872	493.429	428.312	475.734
hsa-miR-545-5p	23	14	19	27	34	24	107.869	76.1967	78.6992	97.9602	138.691	103.797
hsa-miR-548aa	181	127	155	187	157	161	747.016	608.267	564.977	597.049	563.577	612.746
hsa-miR-548ah-3p	21	6	22	12	11	6	98.489	32.6557	91.1254	43.5379	44.8708	25.9491
hsa-miR-548aj-5p	7	2	10	2	10	5	31.4023	10.412	39.6197	6.94082	39.0181	20.6841
hsa-miR-548al	9	5	12	4	7	11	42.2096	27.2131	49.7047	14.5126	28.5541	47.5734
hsa-miR-548am-5p	13	11	19	14	9	12	60.9694	59.8688	78.6992	50.7942	36.7125	51.8983
hsa-miR-548aq-3p	10	3	14	3	6	4	46.8995	16.3279	57.9889	10.8845	24.475	17.2994
hsa-miR-548at-5p	16	11	16	8	9	16	75.0392	59.8688	66.273	29.0252	36.7125	69.1977
hsa-miR-548au-5p	5	5	12	10	8	16	24.5664	28.509	52.0716	38.0092	34.1873	72.4928
hsa-miR-548ay-3p	4	14	6	8	6	4	18.7598	76.1967	24.8524	29.0252	24.475	17.2994
hsa-miR-548ay-5p	3	2	8	9	9	7	14.7398	11.4036	34.7144	34.2083	38.4607	31.7156
hsa-miR-548b-5p	24	21	21	30	29	28	112.559	114.295	86.9833	108.845	118.296	121.096
hsa-miR-548c-3p	7	5	4	9	7	7	32.8297	27.2131	16.5682	32.6534	28.5541	30.274
hsa-miR-548c-5p	12	8	13	13	10	13	56.2794	43.541	53.8468	47.166	40.7916	56.2231
hsa-miR-548d-5p	40	33	27	28	27	20	187.598	179.606	111.836	101.588	110.137	86.4971
hsa-miR-548e-3p	127	117	110	144	147	100	595.624	636.786	455.627	522.454	599.637	432.486
hsa-miR-548e-5p	66	71	80	76	69	76	309.537	386.426	331.365	275.74	281.462	328.689
hsa-miR-548f-5p	51	46	60	62	68	38	239.188	250.36	248.524	224.946	277.383	164.345
hsa-miR-548g-5p	12	4	7	9	8	3	53.8325	20.8239	27.7338	31.2337	31.2145	12.4105
hsa-miR-548h-3p	20	9	13	16	12	12	89.7208	46.8539	51.5056	55.5265	46.8217	49.6418
hsa-miR-548h-5p	10	13	12	5	8	11	46.8995	70.754	49.7047	18.1408	32.6333	47.5734
hsa-miR-548k	887	722	855	859	746	694	4159.99	3929.57	3541.46	3116.59	3043.05	3001.45
hsa-miR-548l	14	24	18	16	12	15	65.6593	130.623	74.5571	58.0505	48.9499	64.8728
hsa-miR-548n	39	20	39	36	34	23	182.908	108.852	161.54	130.614	138.691	99.4717
hsa-miR-548o-3p	389	173	411	222	200	201	1824.39	941.573	1702.39	805.45	815.832	869.296
hsa-miR-548o-5p	16	8	10	13	17	12	75.0392	43.541	41.4206	47.166	69.3457	51.8983
hsa-miR-548s	19	9	14	9	11	9	85.2348	46.8539	55.4676	31.2337	42.9199	37.2314
hsa-miR-548t-3p	182	139	175	183	163	159	751.143	665.741	637.878	584.278	585.115	605.134
hsa-miR-548u	15	11	25	17	20	10	67.2906	57.2658	99.0493	58.997	78.0361	41.3682
hsa-miR-548v	10	5	9	9	7	9	46.8995	27.2131	37.2786	32.6534	28.5541	38.9237
hsa-miR-548w	11	7	9	13	16	11	49.3465	36.4419	35.6578	45.1153	62.4289	45.505
hsa-miR-548x-5p	10	6	4	6	7	8	44.8604	31.2359	15.8479	20.8225	27.3126	33.0945
hsa-miR-548z	17	7	19	25	12	16	76.2627	36.4419	75.2775	86.7602	46.8217	66.1891
hsa-miR-550a-3p	22	14	19	24	12	12	103.179	76.1967	78.6992	87.0757	48.9499	51.8983
hsa-miR-550a-5p	125	87	116	123	81	81	560.755	452.921	459.589	426.86	316.046	335.082
hsa-miR-550b-2-5p	25	15	23	14	8	11	117.249	81.6393	95.2674	50.7942	32.6333	47.5734
hsa-miR-551a	41	47	49	92	84	92	201.445	267.984	212.626	349.685	358.966	416.834
hsa-miR-556-5p	7	11	11	5	6	13	32.8297	59.8688	45.5627	18.1408	24.475	56.2231
hsa-miR-5585-3p	18	8	15	18	24	6	84.4191	43.541	62.1309	65.3068	97.8999	25.9491
hsa-miR-561-3p	15	16	11	22	9	9	70.3493	87.0819	45.5627	79.8194	36.7125	38.9237
hsa-miR-561-5p	1226	1212	1335	1605	1451	1238	5749.88	6596.45	5529.65	5823.19	5918.86	5354.17
hsa-miR-5699-3p	17	23	36	15	10	12	79.7292	125.18	149.114	54.4223	40.7916	51.8983
hsa-miR-5699-5p	15	16	14	23	27	14	70.3493	87.0819	57.9889	83.4476	110.137	60.548
hsa-miR-5701	12	9	18	21	39	40	65.1656	56.7178	86.3293	88.2215	184.206	200.309
hsa-miR-5706	8	2	7	8	6	1	37.5196	10.8852	28.9944	29.0252	24.475	4.32486
hsa-miR-573	37	21	26	7	3	2	159.068	104.77	98.7191	23.2807	11.2177	7.9289
hsa-miR-574-3p	469	608	646	537	468	572	2199.59	3309.11	2675.77	1948.32	1909.05	2473.82
hsa-miR-574-5p	367	566	572	927	810	927	1646.38	2946.59	2266.25	3217.07	3160.46	3834.83
hsa-miR-576-3p	39	53	42	90	83	83	182.908	288.459	173.967	326.534	338.57	358.963
hsa-miR-576-5p	26	14	29	12	4	7	121.939	76.1967	120.12	43.5379	16.3166	30.274
hsa-miR-579-5p	14	14	10	11	18	8	65.6593	76.1967	41.4206	39.9097	73.4249	34.5988
hsa-miR-580-3p	15	12	18	33	19	29	70.3493	65.3114	74.5571	119.729	77.5041	125.421
hsa-miR-582-3p	2667	2949	2860	3530	4821	2837	12508.1	16050.3	11846.3	12807.4	19665.6	12269.6
hsa-miR-582-5p	373	390	475	454	671	562	1673.29	2030.33	1881.94	1575.57	2618.11	2324.89
hsa-miR-584-3p	4	6	5	9	9	6	18.7598	32.6557	20.7103	32.6534	36.7125	25.9491
hsa-miR-584-5p	4513	3546	4333	4512	4511	3616	21165.8	19299.5	17947.6	16370.2	18401.1	15638.7
hsa-miR-585-5p	5	3	7	8	4	11	23.4498	16.3279	28.9944	29.0252	16.3166	47.5734
hsa-miR-589-3p	163	214	190	132	134	146	700.757	1067.66	721.409	439.007	501.057	578.81
hsa-miR-589-5p	1357	1394	1961	1027	1035	1227	6364.26	7587.01	8122.58	3726.12	4221.93	5306.6
hsa-miR-590-3p	279	193	257	258	292	235	1370.81	1100.45	1115.2	980.638	1247.83	1064.74
hsa-miR-590-5p	5	5	7	5	7	7	23.4498	27.2131	28.9944	18.1408	28.5541	30.274
hsa-miR-596	8	4	5	74	52	45	39.3063	22.8072	21.6965	281.268	222.217	203.886
hsa-miR-598-3p	149	95	95	198	147	113	698.803	517.049	393.496	718.375	599.637	488.709
hsa-miR-6131	25	39	34	30	50	34	135.762	245.777	163.066	126.031	236.162	170.263
hsa-miR-616-5p	50	24	61	44	28	37	234.498	130.623	252.666	159.639	114.217	160.02
hsa-miR-618	7	12	21	7	12	16	31.4023	62.4718	83.2014	24.2929	46.8217	66.1891
hsa-miR-619-5p	41	16	28	34	50	32	192.288	87.0819	115.978	123.357	203.958	138.395
hsa-miR-624-5p	14	5	7	11	5	6	65.6593	27.2131	28.9944	39.9097	20.3958	25.9491
hsa-miR-625-3p	282	302	284	403	226	281	1322.57	1643.67	1176.35	1462.15	921.891	1215.28
hsa-miR-625-5p	122	85	150	164	126	151	599.421	484.652	650.895	623.352	538.449	684.151
hsa-miR-627-3p	18	27	31	26	20	20	92.861	161.646	141.244	103.765	89.7416	95.1468
hsa-miR-627-5p	50	51	54	47	61	52	234.498	277.574	223.671	170.523	248.829	224.892
hsa-miR-628-3p	13	8	15	11	16	13	63.8727	45.6143	65.0895	41.8102	68.3745	58.9004
hsa-miR-628-5p	397	223	389	386	345	344	1861.91	1213.7	1611.26	1400.47	1407.31	1487.75
hsa-miR-629-3p	5	4	15	17	7	11	23.4498	21.7705	62.1309	61.6786	28.5541	47.5734
hsa-miR-629-5p	125	150	188	215	260	179	614.16	855.269	815.789	817.199	1111.09	811.013
hsa-miR-636	3	4	8	2	1	3	13.4581	20.8239	31.6958	6.94082	3.90181	12.4105
hsa-miR-641	208	149	183	257	198	175	894.218	743.371	694.831	854.733	740.368	693.779
hsa-miR-651-5p	15	16	23	33	28	37	70.3493	87.0819	95.2674	119.729	114.217	160.02
hsa-miR-6511b-3p	7	5	3	3	1	4	31.4023	26.0299	11.8859	10.4112	3.90181	16.5473
hsa-miR-6511b-5p	7	8	4	11	10	1	30.0939	39.9125	15.1876	36.5839	37.3923	3.96445
hsa-miR-6514-5p	4	5	3	11	4	4	17.9442	26.0299	11.8859	38.1745	15.6072	16.5473
hsa-miR-6515-5p	1	5	5	8	8	13	4.91328	28.509	21.6965	30.4074	34.1873	58.9004
hsa-miR-6516-3p	6	3	11	5	19	19	28.1397	16.3279	45.5627	18.1408	77.5041	82.1723
hsa-miR-652-3p	108	63	101	140	121	147	530.635	359.213	438.27	532.129	517.082	666.028
hsa-miR-6529-5p	13	5	18	3	6	1	60.9694	27.2131	74.5571	10.8845	24.475	4.32486
hsa-miR-654-3p	8190	6127	9288	5971	7313	6693	38410.7	33346.9	38471.5	21663.7	29830.9	28946.3
hsa-miR-654-5p	131	99	202	99	95	153	614.384	538.819	836.697	359.187	387.52	661.703
hsa-miR-655-3p	13	26	40	72	54	48	60.9694	141.508	165.682	261.227	220.275	207.593
hsa-miR-656-3p	126	116	163	167	135	186	619.074	661.408	707.306	634.754	576.91	842.729
hsa-miR-659-5p	17	14	20	18	9	8	79.7292	76.1967	82.8412	65.3068	36.7125	34.5988
hsa-miR-660-5p	557	568	544	765	699	749	2612.3	3091.41	2253.28	2775.54	2851.33	3239.32
hsa-miR-664a-3p	20	26	27	44	61	34	89.7208	135.356	106.973	152.698	238.01	140.652
hsa-miR-664a-5p	5	1	5	6	6	4	21.4956	4.98907	18.9845	19.9549	22.4354	15.8578
hsa-miR-665	926	1215	1003	1302	1316	1230	4777.19	7274.06	4569.94	5196.24	5904.99	5851.53
hsa-miR-671-3p	897	735	1040	450	250	349	4407.21	4190.82	4512.88	1710.42	1068.35	1581.25
hsa-miR-671-5p	47	42	46	90	69	51	210.844	218.651	182.251	312.337	269.225	210.978
hsa-miR-6716-3p	25	30	25	23	6	8	117.249	163.279	103.552	83.4476	24.475	34.5988
hsa-miR-6724-5p	7	5	12	6	4	4	31.4023	26.0299	47.5437	20.8225	15.6072	16.5473
hsa-miR-6735-5p	5	4	3	9	8	4	20.6358	19.158	10.935	28.735	28.7173	15.2235
hsa-miR-6840-5p	20	11	6	2	2	1	85.9825	54.8797	22.7813	6.65162	7.47846	3.96445
hsa-miR-6852-5p	12	7	15	9	17	17	58.9594	39.9125	65.0895	34.2083	72.6479	77.0236
hsa-miR-6859-5p	8	5	4	12	13	2	35.8883	26.0299	15.8479	41.6449	50.7235	8.27364
hsa-miR-6866-5p	9	8	17	11	8	11	40.3744	41.6479	67.3535	38.1745	31.2145	45.505
hsa-miR-6869-5p	6	9	3	7	9	3	28.1397	48.9836	12.4262	25.3971	36.7125	12.9746
hsa-miR-6880-5p	20	14	17	42	9	23	93.799	76.1967	70.4151	152.383	36.7125	99.4717
hsa-miR-7-1-3p	98	85	78	60	62	57	459.615	462.623	323.081	217.689	252.908	246.517
hsa-miR-7-5p	39	25	29	24	16	19	167.666	124.727	110.11	79.8194	59.8277	75.3246
hsa-miR-744-3p	41	34	43	49	21	40	192.288	185.049	178.109	177.78	85.6624	172.994
hsa-miR-744-5p	2897	2200	2993	3234	3202	3105	13586.8	11973.8	12397.2	11733.5	13061.5	13428.7
hsa-miR-758-3p	650	771	759	674	808	860	3048.47	4196.26	3143.83	2445.38	3295.96	3719.38
hsa-miR-766-3p	82	71	110	104	103	91	384.576	386.426	455.627	377.328	420.154	393.562
hsa-miR-766-5p	7	7	3	15	11	17	32.8297	38.0983	12.4262	54.4223	44.8708	73.5225
hsa-miR-769-3p	23	32	51	54	50	59	103.179	166.591	202.061	187.402	195.09	244.072
hsa-miR-769-5p	5479	5576	5487	7422	7253	6986	25696.2	30348	22727.5	26928.2	29586.2	30213.4
hsa-miR-770-5p	25	23	35	32	46	38	112.151	119.738	138.669	111.053	179.483	157.199
hsa-miR-7704	40	20	21	70	76	60	217.219	126.04	100.718	294.072	358.966	300.464
hsa-miR-7705	23	31	23	20	52	17	103.179	161.385	91.1254	69.4082	202.894	70.3259
hsa-miR-7706	452	328	522	601	388	528	1943.2	1636.41	1981.98	1998.81	1450.82	2093.23
hsa-miR-7849-3p	13	3	3	13	9	8	60.9694	16.3279	12.4262	47.166	36.7125	34.5988
hsa-miR-7974	1014	721	762	116	83	91	4359.31	3597.12	2893.23	385.794	310.356	360.765
hsa-miR-7977	813	805	877	914	507	564	4660.25	5354.93	4439.83	4053.05	2527.72	2981.27
hsa-miR-874-3p	330	320	499	774	657	583	1547.68	1741.64	2066.89	2808.19	2680.01	2521.39
hsa-miR-874-5p	83	77	110	94	70	100	372.341	400.861	435.817	326.218	273.126	413.682
hsa-miR-877-5p	68	112	108	196	176	215	350.808	670.531	492.077	782.23	789.726	1022.83
hsa-miR-887-3p	125	115	167	256	194	184	586.244	625.901	691.724	928.808	791.357	795.773
hsa-miR-889-3p	3199	2138	3332	2888	3414	3010	15717.6	12190.4	14458.6	10977.1	14589.4	13637.7
hsa-miR-889-5p	19	24	27	21	9	16	89.1091	130.623	111.836	76.1913	36.7125	69.1977
hsa-miR-9-5p	16	19	30	16	16	7	71.7767	98.9137	118.859	55.5265	62.4289	28.9577
hsa-miR-92a-1-5p	675	422	605	338	319	304	3028.08	2196.93	2396.99	1173	1244.68	1257.59
hsa-miR-92a-3p	236661	158821	242338	137115	102542	100606	1.10993e+06	864402	1.00378e+06	497474	418285	435106
hsa-miR-92b-3p	20157	10742	20722	8579	6504	7263	94535.4	58464.6	85831.8	31125.9	26530.9	31411.4
hsa-miR-92b-5p	6	3	7	13	6	7	28.1397	16.3279	28.9944	47.166	24.475	30.274
hsa-miR-93-3p	24	17	27	26	13	17	112.559	92.5245	111.836	94.332	53.0291	73.5225
hsa-miR-93-5p	7074	6522	7672	9273	9599	8218	31734.3	33953.4	30396.3	32181.1	37453.4	33996.4
hsa-miR-935	166	182	233	229	190	201	744.683	947.489	923.14	794.724	741.343	831.5
hsa-miR-937-3p	36	26	37	18	15	13	168.838	141.508	153.256	65.3068	61.1874	56.2231
hsa-miR-940	37	39	39	25	24	32	181.791	222.37	169.233	95.0231	102.562	144.986
hsa-miR-941	5778	6797	9132	4096	4903	5021	25920.3	35385.1	36180.7	14214.8	19130.6	20771
hsa-miR-942-5p	74	21	68	8	16	16	347.056	114.295	281.66	29.0252	65.2666	69.1977
hsa-miR-98-3p	189	162	226	143	174	152	886.401	881.704	936.106	518.826	709.774	657.378
hsa-miR-98-5p	8445	8473	11079	10055	9676	10865	39606.6	46115.3	45889.9	36481.1	39470	46989.6
hsa-miR-9899	19	19	11	27	19	18	89.1091	103.41	45.5627	97.9602	77.5041	77.8474
hsa-miR-9903	38	20	24	24	27	29	178.218	108.852	99.4095	87.0757	110.137	125.421
hsa-miR-9985	16	10	13	14	8	20	86.8875	63.0198	62.3489	58.8143	37.7859	100.155
hsa-miR-99a-3p	125	141	143	179	167	137	586.244	767.409	592.315	649.44	681.22	592.505
hsa-miR-99a-5p	3796	3757	4278	5447	4872	4647	17803.1	20447.9	17719.7	19762.6	19873.7	20097.6
hsa-miR-99b-3p	728	611	802	1121	993	990	3414.29	3325.44	3321.93	4067.16	4050.61	4281.61
hsa-miR-99b-5p	63876	60477	67440	67526	62638	54423	299575	329153	279341	244995	255511	235372
