# Supplementary material for: A regulatory microRNA network controls endothelial cell phenotypic switch during sprouting angiogenesis
Source: eLife. 2020 Jan 24;9:e48095. doi: 10.7554/eLife.48095 (PMC7299339; doi:10.7554/eLife.48095)
Supplement: Figure 4—source data 1. [file elife-48095-fig4-data1.xlsx]

## Sheet: miR_onelinetargets
Figure 4-source data 1. Co-expression network edges
miRNA	Degree	Target genes
hsa-let-7a-3p	YY1
hsa-let-7a-5p	COL1A2,DDX26B,FBXO32,IDH2,MMP11,PIK3IP1,TP53
hsa-let-7b-5p	ERCC6,PAK1
hsa-let-7c-5p	ADCY9,AHCTF1,ASAP1,CBL,CDC25A,CEP135,CEP164,CHST3,CHUK,CNTRL,CRK,CYTH3,DAPK1,DICER1,DNA2,DYRK1A,FRS2,GAB2,GNPTAB,HCFC2,HK2,HS2ST1,IL6R,ITGB3,KDM3A,KIF2A,KPNA1,LSM11,MAP3K3,MARS2,MTMR3,NNT,NRAS,NUP155,PLXNA2,PLXNA4,PRKAR2A,PRPF38B,RANBP2,RB1,RICTOR,RPS6KA3,RSF1,SH2B3,SKIL,SLK,SMC1A,SUCLG2,TAB2,TAOK1,WASL,YY1,ZKSCAN5,ZNF202,ZNF473,ZNF583
hsa-let-7e-5p	ADCY9,AHCTF1,ASAP1,CBX5,CDC25A,CDCA8,CHST3,CNTRL,CRK,CYTH3,DAPK1,DNA2,DYRK1A,ESPL1,HK2,HMGA1,HNRNPA1,IL6R,ITGB3,KDM3A,LSM11,NCOR1,NRAS,NUP155,PI4K2B,PLXNA4,POLR2D,PPP3CA,PRKAR2A,RANBP2,RBPJ,RICTOR,RRM2,RSF1,SH2B3,SLK,SMC1A,SUCLG2,TAB2,TAOK1,THOC2,TSC1,YY1,ZKSCAN5,ZNF202,ZNF473
hsa-let-7f-5p	WARS2
hsa-let-7g-5p	ACVR2A,ADCY9,AHCTF1,AKT2,ASAP1,CBL,CDC25A,CEP135,CEP164,CHST3,CHUK,CNTRL,CRK,CYTH3,DAPK1,DICER1,DNA2,DYRK1A,ERCC4,FAS,FRS2,GAB2,GDF6,GNPTAB,HCFC2,HIP1,HK2,HS2ST1,ITGB3,KDM3A,KIF2A,KPNA1,MAP3K3,MARS2,MTMR3,NCOR1,NNT,NRAS,NUP155,PLXNA2,PLXNA4,PRKAR2A,RANBP2,RB1,RBPJ,RICTOR,RPS6KA3,RRM2,RSF1,SEMA4C,SH2B3,SKIL,SLK,SMC1A,TAB2,TAOK1,WASL,YY1,ZKSCAN5,ZNF202,ZNF473,ZNF583
hsa-let-7i-5p	KLHL13,NDST2
hsa-miR-106a-5p	CCND2,CSF1,CTSA,GAB1,GDF11,LAPTM4A,MMP2,NAGK,PDGFB,PLXDC2,SEMA4G,SEMA7A,SUMF1,TIMP2,WFS1
hsa-miR-106b-5p	BAMBI,CD274,NPAS2
hsa-miR-10a-5p	NUP50,PAPOLA,PTEN,SRSF1,TBL1X
hsa-miR-10b-5p	ARNT,CBX5,CREB1,CRK,GATA6,GINS2,MAPRE1,NCOA6,NEDD4,NUP50,PTEN,RYBP,SRSF1,TBL1X,UNC5B,WBP11
hsa-miR-1185-1-3p	NCKAP1
hsa-miR-125a-5p	CD34,GGT7,LIPA,MEGF8,MMP11,PSMB8,PSMB9,SORT1,UBE2J1,WARS
hsa-miR-125b-5p	CD34,DNAL4,GDF11,GGT7,MEGF8,MMP11,OAZ2,PSMB8,PSMB9,SORT1,WARS
hsa-miR-1271-5p	CTSB,FN1,SORT1
hsa-miR-128-3p	ADAM19,ADAMTS10,ATP5G3,CSF1,HBEGF,LAPTM4B,MGAT4B,PDIA5,RRAS,SEMA6A,SRSF9
hsa-miR-129-5p	ATP2A3
hsa-miR-1306-5p	ACTR3,APC,BRD4,GAB2,MOB1B,PRPF40A,RAD54B,RSF1,SLC11A2,SMC1A
hsa-miR-130a-3p	CCNA2,CENPO,FANCA,HSPA8,MET,PIK3CB,PRKACB,PTGES3,RACGAP1,SRSF10,TERF2,TFDP2,TNRC6C,WEE1
hsa-miR-132-3p	NFIB
hsa-miR-136-5p	AP3M1,CASP8,CBL,CNOT7,EIF3A,EXOSC2,GINS1,KDM3A,MAP2K4,MAPK1,MTMR4,NR2F2,RAD23B,ROCK1,RYBP,SRSF1,XIAP
hsa-miR-145-5p	AARS,ANGPT2,AP1G1,APPL1,CAMK2D,CRKL,DDX46,DHX15,GNB1,H2AFX,KPNB1,LOX,MAP3K5,NEGR1,ORC2,PAK4,PCBP2,PI4K2B,PLA2G4A,PLXNA2,PPP3CA,PXN,RPS6KB1,RSF1,SH2B3,SP3,SRSF10,TERF2,U2AF2,UBTF,ZFYVE9
hsa-miR-146b-5p	HNRNPD,RPA3
hsa-miR-148a-3p	CDC25B,PTEN,RORA,TNRC6C
hsa-miR-149-5p	KIF2A,RAP1A,TRAF6
hsa-miR-150-5p	CCND2,GAB1,MMP14
hsa-miR-151a-3p	TP53
hsa-miR-154-3p	APC,CCNT2,EVI5,MEGF9,MTMR3,PIAS1,RANBP2,TEAD1,TMF1
hsa-miR-154-5p	CLTC,DYRK1A,EVI5,HNRNPR,PRKCA,RYBP,SRSF10,TAOK1,UBE2D3
hsa-miR-155-5p	SMUG1
hsa-miR-15a-5p	AMOT
hsa-miR-16-5p	ADAMTS13,ADORA2A,AP2A1,BACE2,EGLN2,EXTL3,GABBR1,HSPG2,LHPP,LTBP4,PDK4,PLA2G15,PLXNB1,PPP2R1A,RPL14,UCP2
hsa-miR-17-5p	CCND2,COX7A2L,CSF1,CTSA,GDF11,LAPTM4A,MMP2,PDGFB,PLXDC2,SEMA4G,SUMF1,TIMM17A,TIMP2,WFS1
hsa-miR-181a-5p	CBX5,CCNB1,CUL4A,EXO1,EXOSC2,NEGR1,PIK3CB,POLA1,RAD21,RAN,RBBP7,SACM1L,SRSF10,SRSF7,ZKSCAN1,ZNF655
hsa-miR-181c-5p	BAG4,CBX5,CCNB1,CDC27,CDC5L,CEP135,CUL3,CUL4A,E2F7,EXO1,EXOSC2,GATA6,INPP5E,KAT2B,KITLG,KPNB1,MCL1,NEGR1,NR3C1,PAK4,PI4K2B,PIK3CB,POLA1,PRKCD,PRKCE,PTEN,RAD21,RAN,RAP1B,RBBP7,RORA,RPS6KB1,SACM1L,SH2B3,SLC2A3,SMAD7,SMG7,SRSF10,SRSF7,TBC1D4,TBL1X,YWHAZ,ZKSCAN1,ZNF23,ZNF655
hsa-miR-181d-5p	CBX5,CCNB1,EXOSC2,HNRNPH1
hsa-miR-182-5p	EIF5,GPC1,HIST1H2BH,ITPR1,MED1,YWHAE
hsa-miR-185-5p	ELK1,EVI5,MAPK14,PRKAR2A,ROCK2,TEAD1,TJP1
hsa-miR-186-5p	CEP57,ERCC6L,HPSE,TERF2
hsa-miR-188-5p	ATP6V1G1
hsa-miR-18a-5p	CACNB3
hsa-miR-192-5p	ALCAM,H3F3B,PRKACB,TYMS,USP1
hsa-miR-193a-3p	E2F6,KRAS,LAMP2,NRIP1,PTPRF,SF3B1,ZNF248
hsa-miR-193b-3p	KRAS
hsa-miR-195-5p	ANXA11
hsa-miR-199a-3p	NUP155,PIK3CB,PRKCE,TAB2,YAP1,ZKSCAN1
hsa-miR-199a-5p	B3GNT1,ETS1,HSPA5,MGAT4B,NINL,PAOX,PTGIS,ZNF394,ZNF547
hsa-miR-199b-3p	NUP155,PIK3CB,PRKCE,ZKSCAN1
hsa-miR-199b-5p	GRB10,MATN2
hsa-miR-19a-3p	ACTN1,BAMBI,BMPR2,FBXW11,FRS2,HNRNPF,IGFBP3,IL1RAP,INHBA,ITGA2,PI4KA,PIK3C2A,PIK3CA,SEMA4C,SKIL,VAV2,ZNF445
hsa-miR-19b-3p	AKAP1,APPL1,BMPR2,C19orf40,CCRN4L,CD164,CLIP1,CLTC,FAS,FBXW11,FRS2,GIT2,GJA1,GNAQ,GRSF1,GTF2A1,HHIP,HNRNPF,HS2ST1,IGFBP3,IL1RAP,IL6ST,INHBA,ITGA2,ITGB3,MAML1,MAPK1,MOB1B,MTMR6,NCKAP1,ORC2,PHAX,PI4KA,PIK3CA,PIKFYVE,PPP1R12A,PPP2R5E,PRKACB,PRKAR2A,RAD23B,RAF1,RASA1,RBBP8,RGMB,SEMA4C,SKIL,SMAD5,SMURF1,SPEN,SPOCK1,TNKS,TNRC6B,TRIM33,VAV2,WEE1,YES1,YY1,ZFYVE9,ZNF445
hsa-miR-204-5p	LSM5,SEC61A2
hsa-miR-20a-5p	CCND2,CSF1,CTSA,GAB1,GDF11,LAPTM4A,MMP2,NAGK,PDGFB,PLXDC2,SEMA4G,SEMA7A,TIMP2,WFS1
hsa-miR-212-3p	PSMA2
hsa-miR-215-5p	H3F3B,TYMS
hsa-miR-21-5p	IL6R,MEF2C,NEGR1,PCBP1,RBPJ
hsa-miR-221-3p	CDK8,MEGF9,SMARCA5
hsa-miR-222-3p	AP3M1,ARNT,CBL,CCT4,CDC5L,CDH2,CDKN1B,CHSY1,CREB1,CRKL,FBN2,FRS2,GNAI3,HNRNPA0,HNRNPA3,IRF2,ITGB3,KPNA1,MED1,MTMR2,MXD1,PIK3R1,POLR3E,PPP2R5E,PPP3R1,RANBP10,RANBP2,SOCS1,SRSF10,SUN2,TAOK1,TERF2,TNRC6C,USP6NL,WEE1,WRN,YWHAG
hsa-miR-224-5p	KDELR1,MGAT4B,MGST3
hsa-miR-23a-3p	NAA38,RORA,STAT1
hsa-miR-24-3p	AARS2,CBX5,CCT3,H2AFX,HNRNPA1,LMNB2,LOX,NAGA,TGM2
hsa-miR-25-3p	CALM3,COL1A2,EIF5B,LEPREL2,OAZ3,SLC9A1
hsa-miR-26a-5p	CDC6,PTEN
hsa-miR-26b-5p	AURKA,CDC6,CHST3,CPSF2,CREBBP,CSTF2,EIF2S1,GRSF1,GTF3C2,HMGA1,HSPA8,NUP50,PAWR,PIK3CB,PLXNA2,PRKCD,SKP2,TBC1D4,TNRC6C,WEE1,YWHAE,ZKSCAN1
hsa-miR-27a-3p	CDC25B,H2AFZ,H3F3B,PMF1-BGLAP,PSMA1,RORA
hsa-miR-27b-3p	CBX5,CCNA2,CDC25B,CHERP,DROSHA,GATA2,GATA6,H2AFZ,H3F3B,MAP2K7,MED14,NUP43,ORC5,PDK1,PPP1CC,PRKCD,PRPF19,PTPRJ,PXN,RAP1B,RORA,SMURF2,STAT1,TBP,TSC1,WEE1,XPO1,YAP1,YWHAQ
hsa-miR-28-5p	PPIE
hsa-miR-296-3p	PRPF4
hsa-miR-299-3p	CUL3,GINS2,HNRNPA0,ORC6,VEGFA
hsa-miR-29a-3p	ADAMTS10,AP1S1,BMP1,CALM3,CCND2,COL1A2,COL6A2,CRELD1,CTSF,DNAJB11,FBN1,HAPLN3,HBEGF,IFI30,MEGF6,MFAP2,MGAT4B,MMP2,NID1,PDGFB,PDK4,PLXDC2,SERPINH1,SPARC,TIMM8B
hsa-miR-29b-3p	ADAMTS10,ADAMTS7,AP1S1,BACE1,CALM3,CCND2,CD276,COL1A2,COL3A1,COL6A2,CRELD1,CTSF,DNAJB11,FBN1,GAB1,HAPLN3,IFI30,KIF26A,MEGF6,MFAP2,MGAT4B,MMP2,PDGFB,PLXDC2,SERPINH1
hsa-miR-29c-3p	ADAMTS18,AKT3,AP1G1,ARNT,ARSB,ATP6V1A,CAMK2G,CCNT2,CHSY1,COL27A1,COL8A1,CPSF7,CSGALNACT2,CYTH3,DCP2,DDX46,DDX6,E2F7,FKBP14,FRS2,FSTL1,HBP1,HNRNPF,IL1RAP,ITGB1,KIF3B,KIF5B,KLHL9,KPNA1,KPNB1,LOX,MAPK8,MAPRE1,MCL1,MFAP3,MMP16,MOB1A,MOB1B,MTMR4,MXD1,NCOA3,NCOA4,NEGR1,NOTCH2,NRAS,PDHX,PGM3,PIK3R1,POLE3,PRPF40A,PTPN1,RCOR1,RYBP,SIRT1,SKI,SLK,SPEN,STAG2,SVIL,TACC1,TNRC6B,USP6NL,VEGFA,WASF1,WASF2,XPO5,YY…
hsa-miR-301a-3p	APPL1,CCNA2,CENPO,FANCA,HSPA8,PIK3CB,PRKACB,RACGAP1,RPA2,SRSF10,TERF2,TFDP2,TNRC6C,UBE2D3,WEE1
hsa-miR-30a-5p	CBX3,CDC7,DBF4,DDX46,GATA6,GTF2H1,HNRNPA1,HNRNPC,LOX,MAP3K5,MIS18BP1,MYBL2,NEDD4,NEGR1,NOTCH1,NR3C1,PI4K2B,PIP4K2B,POLR3E,PPID,PPP3CA,RAP1B,SEC61A2,SH2B3,SH3KBP1,SNAI1,SOCS1,SRSF10,SRSF7,TFDP1,TNKS,TNRC6C,XPO1,YBX1
hsa-miR-30b-5p	ABL1,ACVR1,ADAM10,ADAM9,AKAP10,AMOTL1,AP3M1,AP4E1,B4GALT5,BCL6,CABLES2,CAMK2D,CAPZA1,CCNE2,CCNT2,CEP76,CREB1,CRKL,CSNK1A1,DAG1,E2F3,E2F7,EVI5,FANCF,FOXO3,FRS2,GNAQ,HCFC2,INHBA,ITGA2,ITGB3,JAK1,KDM3A,KRAS,LATS2,MAFG,MAML1,MAP3K7,MAPK8,MIS18BP1,NCOA3,NDEL1,NEDD4,NR2F2,NR3C1,NR3C2,NRIP1,ORC2,P4HA1,PELI1,PGM3,PPP1R12A,PPP2R5E,PPP3R1,PRKAR1A,PRPF40A,PSME3,PVRL3,RAD23B,RANBP9,RASA1,REV1,ROCK2,RSF1,SEC2…
hsa-miR-30c-5p	AP3S1,CTHRC1,ELMO1,FBXO32,FUCA1,GNPDA1,NID1,P4HA2,PGM1,SMAD1,SSR3,TIMP2,UBE2J1,VIP
hsa-miR-30d-5p	SEMA6B
hsa-miR-30e-5p	ADAM9,CAMK2D,CBX3,CDC7,CREB1,CRKL,DBF4,DDX46,E2F7,FANCF,GATA6,HNRNPA1,HNRNPC,ITGB3,LOX,MAP3K5,MIS18BP1,MYBL2,NCOA3,NEDD4,NEGR1,NR2F2,NR3C1,ORC2,PELI1,PI4K2B,PIP4K2B,POLR3E,PPID,PPP1R12A,PPP3CA,PPP3CB,PPP3R1,RAP1B,RORA,RSF1,SH2B3,SKP2,SNAI1,SRSF10,SRSF7,SUCLG2,TAOK1,TEAD1,TFDP1,TNKS,TNRC6C,TRIM33,UBE2D3,VIM,XPO1,YBX1,YWHAZ,YY1
hsa-miR-31-5p	CPSF2,ELAVL1,HHIP,PLXNA2,SRSF10,ST3GAL2
hsa-miR-3184-5p	MFAP2,NAGPA,THBS3,VPS37D,YIF1A
hsa-miR-320b	CHEK1,CKAP5,CRKL,DHX15,E2F1,EXO1,H3F3B,HNRNPC,IL6R,ITGB3,KITLG,MAPK1,NEGR1,NR3C1,ORC2,PIK3R1,PPP2CA,RAD51,RSF1,SH2B3,SH3KBP1,SMG7,SUPT16H,TBL1X,TERF2,TNKS,TNRC6C,TSC1,XPO1,YWHAE,YWHAH,YWHAQ,YWHAZ,ZMIZ1
hsa-miR-320c	CHEK1,CKAP5,CRKL,DHX15,E2F1,EXO1,HNRNPC,IL6R,ITGB3,KITLG,MAPK1,NEGR1,NR3C1,ORC2,PIK3R1,PPP1CB,PPP2CA,RAD51,RSF1,SH2B3,SMG7,SUPT16H,TBL1X,TERF2,TNKS,TNRC6C,TSC1,XPO1,YWHAE,YWHAH,YWHAZ,ZMIZ1
hsa-miR-320d	CHEK1,CKAP5,E2F1,H3F3B,HNRNPC,RAD51,SH3KBP1,SMG7,TNRC6C,TSC1,YWHAE,YWHAH
hsa-miR-323a-3p	APPL1,ARF6,CUL4A,CYTH3,GNAQ,GRSF1,HK2,KRAS,MAP3K3,MTMR2,PCBP1,ROCK1,ROCK2,SIN3A,SKI,SMC3,STAG2,TBL1XR1,WEE1,ZFPM2
hsa-miR-324-5p	AP1G1,BRD2,CCNT1,RAN,ROCK1,RYBP
hsa-miR-32-5p	AARS,GATA2,GATA6,GIT2,NEGR1,NRF1,NUP43,PIK3CB,PPP1R12A,PTEN,RBPJ,SMAD7,SYNJ1
hsa-miR-329-3p	ADCY9,AKAP1,BMP2,BMPR2,BRD4,CCNT1,CSNK1G3,DAPK1,E2F1,IL6ST,KIF2A,MAPK1,MED14,NCKAP1,PRKACB,PRKCA,PTPRJ,SPEN,TOPBP1,TRIM33,YARS2
hsa-miR-330-3p	DCTN2,RAD9A,SUMF1
hsa-miR-331-3p	SEMA4G
hsa-miR-339-5p	THRA
hsa-miR-33a-5p	CDK8,EVI5,SKI,SMARCA5
hsa-miR-33b-5p	CPSF2,CREBBP,CRK,DDX46,FRS2,HNRNPA2B1,HNRNPA3,HSPA8,MAP3K7,NCOA3,NPC1,PAPOLA,PDPK1,ROCK1,SH2B3,TERF2,TFDP2,TNRC6C,YWHAH,ZMIZ1,ZNF496
hsa-miR-340-5p	DHH,ZNF514
hsa-miR-342-3p	AKT2,BCL2L1,BMPR2,HIP1,IRF1,RASA1
hsa-miR-34a-5p	CCNE2,HCFC2,PRPF38B,VCL
hsa-miR-34c-5p	AP3S2,CDC25A,HCFC2,HS2ST1,PPM1A,PPP3R1,PRKACB,TBL1XR1,VCL,YY1
hsa-miR-362-3p	E2F1,HHIP,RGMB,SMAD6,SRSF4
hsa-miR-362-5p	MYLK
hsa-miR-365a-3p	ADM,GDF11,RGS20
hsa-miR-365b-3p	ADM,RGS20
hsa-miR-370-3p	ANAPC7,BAG4,HNRNPA3,KNTC1,MAML1,MAPK1,NARS,NUP188,POM121,SMARCA5,SRSF11,TAOK1
hsa-miR-374b-5p	AKT1,CAPZA2,KIF20A,LIN9,NCBP1,NUP85,PLXNA2,PRKCA,PRKCE,RSF1,SMAD6,SRSF7,TFDP1
hsa-miR-376a-3p	BAG4,BMPR2,PIK3CB,PRKACB,PRKCE,PRKD1,RASA1,RYBP,SRSF1,WWTR1
hsa-miR-376b-3p	BAG4,BMPR2,PRKD1,RASA1,RYBP,SEMA4C,SLIT2,WWTR1
hsa-miR-376c-3p	ADCY9,ALCAM,ARNT,CREB1,CREBBP,EIF4E,GNAQ,HNRNPK,NR2F1,NR2F2,PAFAH1B1,ROCK1,RYBP,SP3,TAB2,USP1
hsa-miR-377-3p	CD274,CUL4A,NEGR1,PPM1A,PPP1R12A,PRKD1
hsa-miR-378c	RCC2
hsa-miR-378d	RCC2
hsa-miR-379-3p	CTGF,PLXDC2
hsa-miR-379-5p	IGF1R,ZFAND5
hsa-miR-381-3p	CEP41
hsa-miR-382-3p	B4GALT5,BMP2,BTRC,CCNT1,CD274,CDC5L,EIF4H,FOXO3,GJA1,LNPEP,MED7,PCF11,PDPK1,PRKD1,RCOR1,RPS6KA3,SP1,SRSF10,TAF1,TERF1,WASF2,XIAP
hsa-miR-382-5p	AMOTL2,DICER1
hsa-miR-409-3p	CCND2,CRTAP,PLA2G12A
hsa-miR-409-5p	ADCY6
hsa-miR-411-3p	CTGF,PLXDC2
hsa-miR-421	NFIB
hsa-miR-423-3p	ARFGAP1
hsa-miR-423-5p	MYBL2,ODC1,PA2G4
hsa-miR-424-5p	ACTR2,ACVR2A,AMOTL1,AP3M1,ARHGAP26,ARHGAP35,ARHGDIA,BAG4,BTRC,CAPZA2,CARM1,CCNT2,CD164,CDC23,CDC25A,CDC27,CDK8,CLASP1,CLSPN,COL12A1,CRIM1,CRK,CRKL,CTDSP2,E2F3,E2F7,EIF3A,EIF4E,FOXO1,FRS2,FSTL1,FURIN,GNAI3,GNAQ,IARS,IRAK2,ITGA2,KIF3B,KLC2,KPNA1,KSR1,LATS2,M6PR,MAP2K1,MAP3K3,MAPK8,MFN2,MTMR3,MTMR4,NOTCH2,PAFAH1B1,PELI2,PI4K2B,PIK3R1,PLXNA2,POLR3F,PPP2R5C,PRKAR2A,PRKCD,PSME3,PTPRJ,RAD23B,RAF1,RAPGEF…
hsa-miR-425-5p	PTPRN2
hsa-miR-431-5p	ATP6V0E1,CD34,FBXO32
hsa-miR-433-3p	ST6GALNAC3
hsa-miR-452-5p	CRKL,INHBA,PTPRJ,RAD52,SEC61A2,ST3GAL2,ZKSCAN1
hsa-miR-454-3p	ACVR1,AKAP1,APPL1,ARHGAP35,BMPR2,CCRN4L,CENPO,CHST11,CLIP1,CREB1,DDX6,DNM2,E2F7,FANCA,GJA1,GTF2H1,HHIP,HSPA8,IL6ST,INHBA,ITPR1,MAML1,MAPK1,MET,MXD1,NCOA3,PAFAH1B1,PELI1,PIK3CB,PRKACB,PTGES3,PTPRJ,RACGAP1,RBBP8,RPA2,RYBP,SMURF2,SPEN,SPOCK1,SRSF10,TERF2,TFDP2,TNRC6B,TSC1,VAV2,WEE1,YY1,ZFYVE9
hsa-miR-455-5p	HCFC2,NMT2
hsa-miR-485-3p	SPCS2
hsa-miR-486-5p	B3GNT9,CD47,FBN1
hsa-miR-493-5p	EIF5B,GNG11,PDK4,RPL29
hsa-miR-494-3p	BHLHE40,BMPR2,CAMK2D,CBX3,CCNT1,CCRN4L,CEP76,CKS1B,CPT1A,CUL3,CUL4A,H3F3B,HHIP,IARS,IL6ST,KNTC1,NEGR1,PAWR,PIP4K2B,PTEN,RYBP,SLIT2,SMAD9,SRP9,SRSF7,TBC1D4,TBL1X,YBX1,YY1,ZNF621
hsa-miR-495-3p	CCAR1,CCNT2,CEP63,CNOT2,DYRK1A,E2F3,HIF1A,REV1,S1PR1,SAV1,SLU7,SMNDC1,TAF1,THSD4
hsa-miR-497-5p	ADAMTS18,AKT3,AP3M1,BAG4,CAPZA2,CRK,CTDSP2,EIF3A,EVI5,FRS2,GNAI3,GNAQ,KIF3B,KRAS,LATS2,MAP3K3,MAPK8,MTMR3,NOTCH2,PIAS1,PLRG1,PPM1A,PRKAR2A,RAD23B,RICTOR,ROCK1,ROCK2,RPS6KA3,RSF1,SEH1L,SLC2A3,SMAD5,SRSF11,STAG1,TAOK1,TBL1XR1,TEAD1,WASL,WEE1
hsa-miR-532-5p	CYCS,DHFR,ERCC6L,HNRNPA3,IL6ST,MTMR4,PLXNA4,PPM1A,PTPRJ,RCOR1,SF3A3,TEAD1,TPR,XPO1,YY1,ZKSCAN1
hsa-miR-539-3p	GINS2,NRF1
hsa-miR-542-3p	ATP6V0A2,PLXNA2
hsa-miR-543	COX7B
hsa-miR-551a	MEF2C
hsa-miR-652-3p	UBE2I
hsa-miR-655-3p	CDC42,EIF4E,ETF1,GNAI3,MFN1,PPP1CB,PTBP1,SRF,SRSF7,YWHAZ
hsa-miR-665	AKT3,HS6ST1,MAFG,ZNF445
hsa-miR-7-5p	CACNG7,COL1A2,CTSB,GABBR1,NLGN2,SORT1
hsa-miR-877-5p	CDC40,CDKN1B,CLTC,CSNK1G3,ELF1,HNRNPC,NCOR1,ORC2,POLH
hsa-miR-92a-3p	ADM,CALM3,COL1A2,FBN1,FBXO32,GAA,GDF11,LEPREL2,PLXDC2,RPL15
hsa-miR-92b-3p	ADAM19,ADM,CALM3,COL1A2,FBN1,FBXO32,GAA,GDF11,LEPREL2,PLXDC2,RPL15
hsa-miR-93-5p	BAMBI,E2F1,RBL1
hsa-miR-9-5p	CD47,CSNK1G2,GDF11,MGAT1
hsa-miR-98-5p	ERCC6
hsa-miR-99a-5p	MTMR3,MTOR,PPP1CB,SMARCA5,TAOK1
