# Supplementary material for: A regulatory microRNA network controls endothelial cell phenotypic switch during sprouting angiogenesis
Source: eLife. 2020 Jan 24;9:e48095. doi: 10.7554/eLife.48095 (PMC7299339; doi:10.7554/eLife.48095)
Supplement: Figure 7—source data 1. [file elife-48095-fig7-data1.xlsx]

## Sheet: HUB1_miR-424-5p_summary
Figure 7-source data 1. Hub miRNA interactions supported by experimental evidence.
miRNA_ID	Gene name	miRTarBase_evidence_method	TarBase_evidence_method	starBase_RBP
hsa-miR-424-5p	YWHAQ	CLASH	HITS-CLIP	AGO1,AGO1-4,AGO2
hsa-miR-424-5p	IARS	CLASH	HITS-CLIP	AGO1,AGO1-4,AGO2
hsa-miR-424-5p	SMURF1	CLASH	PAR-CLIP	AGO1,AGO1-4,AGO2
hsa-miR-424-5p	NOTCH2	HITS-CLIP	HITS-CLIP	AGO1-4,AGO2
hsa-miR-424-5p	TNRC6B	HITS-CLIP	HITS-CLIP	AGO1,AGO1-4,AGO2
hsa-miR-424-5p	CDC25A	Luciferase reporter assay	PAR-CLIP	AGO1,AGO1-4,AGO2
hsa-miR-424-5p	MAP2K1	Luciferase reporter assay	PAR-CLIP	AGO2
hsa-miR-424-5p	TAOK1	PAR-CLIP	HITS-CLIP	AGO1-4,AGO2
hsa-miR-424-5p	PI4K2B	PAR-CLIP	HITS-CLIP	AGO1-4,AGO2
hsa-miR-424-5p	CRIM1	PAR-CLIP	HITS-CLIP	AGO1,AGO1-4,AGO2
hsa-miR-424-5p	ARHGDIA	PAR-CLIP	HITS-CLIP	AGO1,AGO1-4,AGO2,AGO3
hsa-miR-424-5p	ACTR2	PAR-CLIP	HITS-CLIP	AGO1,AGO1-4,AGO2,AGO3
hsa-miR-424-5p	SKI	PAR-CLIP	HITS-CLIP	AGO1,AGO1-4,AGO2,AGO3
hsa-miR-424-5p	VEGFA	PAR-CLIP	HITS-CLIP	AGO1,AGO1-4,AGO2,AGO3,AGO4
hsa-miR-424-5p	E2F7	PAR-CLIP	HITS-CLIP	AGO1,AGO1-4,AGO2,AGO3,AGO4
hsa-miR-424-5p	CARM1	PAR-CLIP	PAR-CLIP	AGO1-4,AGO2
hsa-miR-424-5p	CRK	PAR-CLIP	PAR-CLIP	AGO1,AGO1-4,AGO2
hsa-miR-424-5p	KPNA1	PAR-CLIP	PAR-CLIP	AGO1,AGO1-4,AGO2,AGO3
hsa-miR-424-5p	CRKL	PAR-CLIP	PAR-CLIP	AGO1,AGO1-4,AGO2,AGO3
hsa-miR-424-5p	CAPZA2	PAR-CLIP	PAR-CLIP	AGO1,AGO1-4,AGO2,AGO3
hsa-miR-424-5p	AMOTL1	PAR-CLIP	PAR-CLIP	AGO1,AGO1-4,AGO2,AGO3,AGO4
hsa-miR-424-5p	PRKAR2A	PAR-CLIP	PAR-CLIP	AGO1,AGO1-4,AGO2,AGO3,AGO4
hsa-miR-424-5p	BAG4	PAR-CLIP	PAR-CLIP	AGO1,AGO1-4,AGO2,AGO3,AGO4
hsa-miR-424-5p	PPP2R5C	PAR-CLIP	PAR-CLIP	AGO1,AGO2
hsa-miR-424-5p	ACVR2A	PAR-CLIP	NA	AGO1-4,AGO2
hsa-miR-424-5p	ITGA2	PAR-CLIP	NA	AGO1,AGO1-4,AGO2
hsa-miR-424-5p	PIK3R1	PAR-CLIP	NA	AGO1,AGO1-4,AGO2
hsa-miR-424-5p	FURIN	PAR-CLIP	NA	AGO1,AGO1-4,AGO2,AGO3,AGO4
hsa-miR-424-5p	MTMR3	PAR-CLIP	NA	AGO2
hsa-miR-424-5p	CLSPN	PAR-CLIP	NA	NA
hsa-miR-424-5p	RAD23B	PAR-CLIP	NA	NA
hsa-miR-424-5p	ROCK2	NA	HITS-CLIP	AGO1-4
hsa-miR-424-5p	CD164	NA	HITS-CLIP	AGO1-4,AGO2
hsa-miR-424-5p	PRKCD	NA	HITS-CLIP	AGO1-4,AGO2
hsa-miR-424-5p	SOS2	NA	HITS-CLIP	AGO1-4,AGO2
hsa-miR-424-5p	USP6NL	NA	HITS-CLIP	AGO1-4,AGO2
hsa-miR-424-5p	SKIL	NA	HITS-CLIP	AGO1-4,AGO2
hsa-miR-424-5p	M6PR	NA	HITS-CLIP	AGO1-4,AGO2
hsa-miR-424-5p	COL12A1	NA	HITS-CLIP	AGO1-4,AGO2
hsa-miR-424-5p	E2F3	NA	HITS-CLIP	AGO1,AGO1-4,AGO2
hsa-miR-424-5p	SMURF2	NA	HITS-CLIP	AGO1,AGO1-4,AGO2
hsa-miR-424-5p	YAP1	NA	HITS-CLIP	AGO1,AGO1-4,AGO2
hsa-miR-424-5p	MTMR4	NA	HITS-CLIP	AGO1,AGO1-4,AGO2
hsa-miR-424-5p	RPS6KA3	NA	HITS-CLIP	AGO1,AGO1-4,AGO2
hsa-miR-424-5p	MFN2	NA	HITS-CLIP	AGO1,AGO1-4,AGO2
hsa-miR-424-5p	SLIT2	NA	HITS-CLIP	AGO1,AGO1-4,AGO2
hsa-miR-424-5p	SPEN	NA	HITS-CLIP	AGO1,AGO1-4,AGO2,AGO3
hsa-miR-424-5p	RSF1	NA	HITS-CLIP	AGO1,AGO1-4,AGO2,AGO3
hsa-miR-424-5p	CCNT2	NA	HITS-CLIP	AGO1,AGO1-4,AGO2,AGO3,AGO4
hsa-miR-424-5p	CLASP1	NA	HITS-CLIP	AGO2
hsa-miR-424-5p	SRPR	NA	HITS-CLIP	NA
hsa-miR-424-5p	FOXO1	NA	Luciferase Reporter Assay	AGO1,AGO1-4,AGO2
hsa-miR-424-5p	LATS2	NA	PAR-CLIP	AGO1-4,AGO2
hsa-miR-424-5p	SUPT16H	NA	PAR-CLIP	AGO1-4,AGO2
hsa-miR-424-5p	ARHGAP35	NA	PAR-CLIP	AGO1-4,AGO2
hsa-miR-424-5p	FRS2	NA	PAR-CLIP	AGO1,AGO1-4,AGO2
hsa-miR-424-5p	GNAI3	NA	PAR-CLIP	AGO1,AGO1-4,AGO2
hsa-miR-424-5p	PTPRJ	NA	PAR-CLIP	AGO1,AGO1-4,AGO2
hsa-miR-424-5p	RICTOR	NA	PAR-CLIP	AGO1,AGO1-4,AGO2
hsa-miR-424-5p	PSME3	NA	PAR-CLIP	AGO1,AGO1-4,AGO2
hsa-miR-424-5p	UNC5B	NA	PAR-CLIP	AGO1,AGO1-4,AGO2
hsa-miR-424-5p	PAFAH1B1	NA	PAR-CLIP	AGO1,AGO1-4,AGO2,AGO3
hsa-miR-424-5p	MAPK8	NA	PAR-CLIP	AGO1,AGO1-4,AGO2,AGO3
hsa-miR-424-5p	SEH1L	NA	PAR-CLIP	AGO1,AGO1-4,AGO2,AGO3
hsa-miR-424-5p	SMAD5	NA	PAR-CLIP	AGO1,AGO1-4,AGO2,AGO3,AGO4
hsa-miR-424-5p	SYNJ1	NA	PAR-CLIP	AGO1,AGO2
hsa-miR-424-5p	CDC23	NA	PAR-CLIP	AGO2
hsa-miR-424-5p	PLXNA2	NA	PAR-CLIP	AGO2
hsa-miR-424-5p	ARHGAP26	NA	NA	AGO1-4
hsa-miR-424-5p	BTRC	NA	NA	AGO1-4,AGO2
hsa-miR-424-5p	KLC2	NA	NA	AGO1-4,AGO2
hsa-miR-424-5p	AP3M1	NA	NA	AGO1-4,AGO2
hsa-miR-424-5p	RAPGEF1	NA	NA	AGO1-4,AGO2
hsa-miR-424-5p	RAF1	NA	NA	AGO1-4,AGO2
hsa-miR-424-5p	FSTL1	NA	NA	AGO1-4,AGO2
hsa-miR-424-5p	TACC1	NA	NA	AGO1-4,AGO2
hsa-miR-424-5p	CTDSP2	NA	NA	AGO1-4,AGO2
hsa-miR-424-5p	SRP72	NA	NA	AGO1-4,AGO2
hsa-miR-424-5p	MAP3K3	NA	NA	AGO1-4,AGO2
hsa-miR-424-5p	RYBP	NA	NA	AGO1-4,AGO2
hsa-miR-424-5p	TEAD1	NA	NA	AGO1-4,AGO2
hsa-miR-424-5p	KSR1	NA	NA	AGO1-4,AGO2
hsa-miR-424-5p	TAB3	NA	NA	AGO1-4,AGO2
hsa-miR-424-5p	ZNF436	NA	NA	AGO1-4,AGO2
hsa-miR-424-5p	IRAK2	NA	NA	AGO1-4,AGO2
hsa-miR-424-5p	EIF3A	NA	NA	AGO1-4,AGO2
hsa-miR-424-5p	KIF3B	NA	NA	AGO1,AGO1-4,AGO2
hsa-miR-424-5p	WBP11	NA	NA	AGO1,AGO1-4,AGO2
hsa-miR-424-5p	EIF4E	NA	NA	AGO1,AGO1-4,AGO2
hsa-miR-424-5p	POLR3F	NA	NA	AGO1,AGO1-4,AGO2,AGO3
hsa-miR-424-5p	GNAQ	NA	NA	AGO1,AGO1-4,AGO2,AGO3
hsa-miR-424-5p	CDC27	NA	NA	AGO1,AGO1-4,AGO2,AGO3,AGO4
hsa-miR-424-5p	SRSF11	NA	NA	AGO1,AGO1-4,AGO2,AGO3,AGO4
hsa-miR-424-5p	SRSF10	NA	NA	AGO1,AGO2
hsa-miR-424-5p	PELI2	NA	NA	AGO2
hsa-miR-424-5p	CDK8	NA	NA	AGO2
hsa-miR-424-5p	RSPO3	NA	NA	AGO2
hsa-miR-424-5p	ROCK1	NA	NA	NA
hsa-miR-29a-3p	MMP2	Immunofluorescence//Immunohistochemistry//Luciferase reporter assay//Northern blot//qRT-PCR//Western blot	HITS-CLIP	AGO1-4,AGO2
hsa-miR-29a-3p	CCND2	Immunofluorescence//Immunohistochemistry//Luciferase reporter assay//Northern blot//qRT-PCR//Western blot	HITS-CLIP	AGO1,AGO1-4,AGO2
hsa-miR-29a-3p	FBN1	Luciferase reporter assay	HITS-CLIP	AGO1-4,AGO2
hsa-miR-29a-3p	SPARC	Luciferase reporter assay//Microarray//Northern blot//qRT-PCR//Western blot	HITS-CLIP	AGO1-4,AGO2
hsa-miR-29a-3p	SERPINH1	Luciferase reporter assay//qRT-PCR//Western blot	HITS-CLIP	AGO1-4,AGO2
hsa-miR-29a-3p	COL1A2	Luciferase reporter assay//Western blot	HITS-CLIP	AGO1-4,AGO2
hsa-miR-29a-3p	CALM3	PAR-CLIP	HITS-CLIP	AGO1,AGO1-4,AGO2
hsa-miR-29a-3p	COL6A2	NA	HITS-CLIP	AGO1-4,AGO2
hsa-miR-29a-3p	PDGFB	NA	HITS-CLIP	AGO1-4,AGO2
hsa-miR-29a-3p	HAPLN3	NA	HITS-CLIP	AGO1-4,AGO2
hsa-miR-29a-3p	DNAJB11	NA	HITS-CLIP	AGO1,AGO1-4,AGO2
hsa-miR-29a-3p	PLXDC2	NA	HITS-CLIP	NA
hsa-miR-29a-3p	NID1	NA	Microarrays	AGO1-4,AGO2
hsa-miR-29a-3p	PDK4	NA	Microarrays	AGO1-4,AGO2
hsa-miR-29a-3p	IFI30	NA	PAR-CLIP	AGO1-4,AGO2
hsa-miR-29a-3p	MEGF6	NA	NA	AGO1-4
hsa-miR-29a-3p	CRELD1	NA	NA	AGO1-4
hsa-miR-29a-3p	MFAP2	NA	NA	AGO1-4
hsa-miR-29a-3p	TIMM8B	NA	NA	AGO1-4,AGO2
hsa-miR-29a-3p	AP1S1	NA	NA	AGO1-4,AGO2
hsa-miR-29a-3p	HBEGF	NA	NA	AGO1-4,AGO2
hsa-miR-29a-3p	BMP1	NA	NA	AGO1-4,AGO2
hsa-miR-29a-3p	MGAT4B	NA	NA	AGO2
hsa-miR-29a-3p	ADAMTS10	NA	NA	NA
hsa-miR-29a-3p	CTSF	NA	NA	NA
