# Supplementary material for: A regulatory microRNA network controls endothelial cell phenotypic switch during sprouting angiogenesis
Source: eLife. 2020 Jan 24;9:e48095. doi: 10.7554/eLife.48095 (PMC7299339; doi:10.7554/eLife.48095)
Supplement: Figure 9—source data 1. [file elife-48095-fig9-data1.xlsx]

## Sheet: Sheet1
Figure 9-source data 1. Genes constituting the UP-regulated gene module and the enrichment core in CRC.
UP-module	UP-module core
ACTR1A	ACTR1A
ADAM19	ADAM19
ADAMTS10	ADAMTS10
ADAMTS13	ADAMTS7
ADAMTS7	ADORA2A
ADM	ANGPTL2
ADORA2A	AP2A1
ANGPTL2	B3GNT9
AP1S1	BACE1
AP2A1	BCL2L11
AP3S1	BMP1
ATP2A3	CD276
ATP6V0E1	CD34
B3GNT1	COL1A2
B3GNT9	COL3A1
BACE1	COL6A2
BCL2L11	CRELD1
BMP1	CRISPLD1
BRF2	CSF1
CACNB3	CTGF
CALM3	CTHRC1
CCND2	CTSF
CD276	CTSO
CD34	ELMO1
CD47	ETS1
CDK6	EXTL3
COL1A2	FBN1
COL3A1	FBXO32
COL6A2	GAA
COX7A2L	HAPLN3
CRELD1	HSPG2
CRISPLD1	IFI30
CRTAP	LEPREL2
CSF1	LTBP4
CSNK1G2	MEGF6
CTGF	MEGF8
CTHRC1	MFAP2
CTSA	MMP11
CTSF	MMP14
CTSO	MMP2
DCTN2	NAGK
DDX26B	NID1
DNAJB11	OAZ2
DNAL4	PDGFB
EGLN2	PDK4
EIF5B	PIK3IP1
ELMO1	PLA2G15
ETS1	PLXDC2
EXTL3	PTGIS
F3	SDC3
FBN1	SERPINH1
FBXO32	SPARC
FUCA1	TCF4
GAA	THBS3
GAB1	TIMP2
GABBR1	UCP2
GDF11	VIP
GGT7	VKORC1
HAPLN3
HBEGF
HSPA5
HSPG2
IDH2
IFI30
LAMP1
LAPTM4A
LEPREL2
LHPP
LIPA
LTBP4
MAP3K1
MEGF6
MEGF8
MFAP2
MGAT4B
MMP11
MMP14
MMP2
NAGK
NAGPA
NID1
NINL
OAZ2
OAZ3
P4HA2
PAOX
PDGFB
PDHB
PDIA5
PDK4
PGM1
PIK3IP1
PLA2G15
PLXDC2
PLXNB1
PPP1R13B
PPP2R1A
PSEN2
PSMA5
PSMB8
PSMB9
PTGIS
RAD9A
RBX1
RGS20
RPL14
RPL15
SDC3
SEMA4G
SEMA6A
SEMA7A
SERPINH1
SLC9A1
SMAD1
SORT1
SPARC
SSR3
SUMF1
TCF4
THBS3
TIMM17A
TIMM8B
TIMP2
TP53
UBE2J1
UCP2
VIP
VKORC1
VPS37D
WARS
WFS1
XBP1
YIF1A
ZNF394
ZNF547
