# Supplementary material for: A regulatory microRNA network controls endothelial cell phenotypic switch during sprouting angiogenesis
Source: eLife. 2020 Jan 24;9:e48095. doi: 10.7554/eLife.48095 (PMC7299339; doi:10.7554/eLife.48095)
Supplement: Supplementary file 2. [file elife-48095-supp2.xlsx]

## Sheet: Sheet1
Supplementary File 2. List of real-time PCR assays.
Real-time PCR Assay	SOURCE	Assay ID
ACTR2	ThermoFisher Scientific	Hs00855199_g1; Cat No 4331182
ADAMTS10	ThermoFisher Scientific	Hs00372848_m1; Cat No 4331182
AMOTL1	ThermoFisher Scientific	Hs00982923_m1; Cat No 4331182
AP1S1	ThermoFisher Scientific	Hs00611076_m1; Cat No 4331182
ARHGDIA TaqMan assay	ThermoFisher Scientific	Hs00366348_g1; Cat No 4331182
BTRC TaqMan assay	ThermoFisher Scientific	Hs00182707_m1; Cat No 4331182
CARM1 TaqMan assay	ThermoFisher Scientific	Hs00406354_m1; Cat No 4331182
CCNB1 TaqMan assay	ThermoFisher Scientific	Hs01030099_m1; Cat No 4331182
CCND2 TaqMan assay	ThermoFisher Scientific	Hs00153380_m1; Cat No 4331182
CDC23	ThermoFisher Scientific	Hs00190562_m1; Cat No 4331182
COL1A2 TaqMan assay	ThermoFisher Scientific	Hs01028956_m1; Cat No 4331182
COL6A2 TaqMan assay	ThermoFisher Scientific	Hs00365167_m1; Cat No 4331182
CTSF	ThermoFisher Scientific	Hs00186901_m1; Cat No 4331182
DICER1 TaqMan assay	ThermoFisher Scientific	Hs 00229023_m1; Cat No 4331182
EIF3A	ThermoFisher Scientific	Hs01025769_m1; Cat No 4331182
EIF4E3	ThermoFisher Scientific	Hs00381656_m1; Cat No 4331182
FBN1	ThermoFisher Scientific	Hs00171191_m1; Cat No 4331182
FOXO1	ThermoFisher Scientific	Hs00231106_m1; Cat No 4331182
HAPLN3 TaqMan assay	ThermoFisher Scientific	Hs00820260_m1; Cat No 4331182
hsa-miR-16-5p TaqMan® MiRNA Assay	ThermoFisher Scientific	1544; Cat No 4368814
hsa-miR-29a-3p TaqMan® MiRNA Assay	ThermoFisher Scientific	2112; Cat No 4427976
hsa-miR-424-5p TaqMan® MiRNA Assay	ThermoFisher Scientific	604; Cat No 4427977
IMPDH2 TaqMan assay	ThermoFisher Scientific	Hs00168418_m1; Cat No 4331182
ITGA2 TaqMan assay	ThermoFisher Scientific	Hs00158127_m1; Cat No 4331182
KDR TaqMan assay	ThermoFisher Scientific	Hs00911700_m1; Cat No 4331182
KIF3B TaqMan assay	ThermoFisher Scientific	Hs01122781_m1; Cat No 4331182
KSR1	ThermoFisher Scientific	Hs01075797_m1; Cat No 4331182
MAP2K1 TaqMan assay	ThermoFisher Scientific	Hs00983247_g1; Cat No 4331182
MAP2K1 TaqMan assay	ThermoFisher Scientific	Hs01548810_m1; Cat No 4331182
MAP3K3 TaqMan assay	ThermoFisher Scientific	Hs00176747_m1; Cat No 4331182
MAPK1 TaqMan assay	ThermoFisher Scientific	Hs01046830_m1; Cat No 4331182
MAPK14 TaqMan assay	ThermoFisher Scientific	Hs01051152_m1; Cat No 4331182
MEGF6	ThermoFisher Scientific	Hs00390990_m1; Cat No 4331182
MFAP2 TaqMan assay	ThermoFisher Scientific	Hs01027737_m1; Cat No 4331182
MMP2 TaqMan assay	ThermoFisher Scientific	Hs01548727_m1; Cat No 4331182
NID1 TaqMan assay	ThermoFisher Scientific	Hs00915875_m1; Cat No 4331182
NOTCH2 TaqMan assay	ThermoFisher Scientific	Hs01050702_m1; Cat No 4331182
PDGFB TaqMan assay	ThermoFisher Scientific	Hs00966522_m1; Cat No 4331182
PDK4 TaqMan assay	ThermoFisher Scientific	Hs01037712_m1; Cat No 4331182
PPP2R5C	ThermoFisher Scientific	Hs00604902_m1; Cat No 4331182
RAF1 TaqMan assay	ThermoFisher Scientific	Hs00234119_m1; Cat No 4331182
RNU44 TaqMan® MiRNA Assay	ThermoFisher Scientific	1094; Cat No 4427975
ROCK1	ThermoFisher Scientific	Hs01127701_m1; Cat No 4331182
SERPINH1 TaqMan assay	ThermoFisher Scientific	Hs01062920_m1; Cat No 4331182
SOS2	ThermoFisher Scientific	Hs01127273_m1; Cat No 4331182
TAOK1 TaqMan assay	ThermoFisher Scientific	Hs01020477_m1; Cat No 4331182
TBP TaqMan assay	ThermoFisher Scientific	Hs00427620_m1; Cat No 4331182
WBP11 TaqMan assay	ThermoFisher Scientific	Hs00929885_m1; Cat No 4331182
YAP1 TaqMan assay	ThermoFisher Scientific	Hs00371735_m1; Cat No 4331182
